# Supplementary material
Source: MDPI journal article supplement (https://www.mdpi.com/1999-4907/8/5/154)
Supplement: s1 [file s1]

| Date (Day<br>Month Year) | Tree_ID | Specie          | DBH (cm) | Merchantable<br>Height (m) | Position of the<br>Seccion (m) | Diameter of the<br>Seccion (cm) | Volume - Smalian<br>Method (m³) |
|--------------------------|---------|-----------------|----------|----------------------------|--------------------------------|---------------------------------|---------------------------------|
| 10-Dec-11                | 237X    | Eschweilera sp. | 22.15    | 12.70                      | 0.00                           | 24.50                           | 0.022128                        |
| 10-Dec-11                | 237X    | Eschweilera sp. | 22.15    | 12.70                      | 0.5                            | 22.95                           | 0.020106                        |
| 10-Dec-11                | 237X    | Eschweilera sp. | 22.15    | 12.70                      | 1.00                           | 22.30                           | 0.011639                        |
| 10-Dec-11                | 237X    | Eschweilera sp. | 22.15    | 12.70                      | 1.30                           | 22.15                           | 0.026671                        |
| 10-Dec-11                | 237X    | Eschweilera sp. | 22.15    | 12.70                      | 2.00                           | 21.90                           | 0.036152                        |
| 10-Dec-11                | 237X    | Eschweilera sp. | 22.15    | 12.70                      | 3.00                           | 21.00                           | 0.033026                        |
| 10-Dec-11                | 237X    | Eschweilera sp. | 22.15    | 12.70                      | 4.00                           | 20.00                           | 0.031337                        |
| 10-Dec-11                | 237X    | Eschweilera sp. | 22.15    | 12.70                      | 5.00                           | 19.95                           | 0.032052                        |
| 10-Dec-11                | 237X    | Eschweilera sp. | 22.15    | 12.70                      | 6.00                           | 20.45                           | 0.030975                        |
| 10-Dec-11                | 237X    | Eschweilera sp. | 22.15    | 12.70                      | 7.00                           | 19.25                           | 0.030103                        |
| 10-Dec-11                | 237X    | Eschweilera sp. | 22.15    | 12.70                      | 8.00                           | 19.90                           | 0.028702                        |
| 10-Dec-11                | 237X    | Eschweilera sp. | 22.15    | 12.70                      | 9.00                           | 18.30                           | 0.026446                        |
| 10-Dec-11                | 237X    | Eschweilera sp. | 22.15    | 12.70                      | 10.00                          | 18.40                           | 0.025948                        |
| 10-Dec-11                | 237X    | Eschweilera sp. | 22.15    | 12.70                      | 11.00                          | 17.95                           | 0.024338                        |
| 10-Dec-11                | 237X    | Eschweilera sp. | 22.15    | 12.70                      | 12.00                          | 17.25                           | 0.015892                        |
| 10-Dec-11                | 237X    | Eschweilera sp. | 22.15    | 12.70                      | 12.70                          | 16.75                           | 0                               |
| 10-Dec-11                | 234X    | Eschweilera sp. | 19.65    | 16.60                      | 0.00                           | 20.80                           | 0.016626                        |
| 10-Dec-11                | 234X    | Eschweilera sp. | 19.65    | 16.60                      | 0.5                            | 20.35                           | 0.016064                        |
| 10-Dec-11                | 234X    | Eschweilera sp. | 19.65    | 16.60                      | 1.00                           | 20.10                           | 0.009309                        |
| 10-Dec-11                | 234X    | Eschweilera sp. | 19.65    | 16.60                      | 1.30                           | 19.65                           | 0.021555                        |
| 10-Dec-11                | 234X    | Eschweilera sp. | 19.65    | 16.60                      | 2.00                           | 19.95                           | 0.031972                        |
| 10-Dec-11                | 234X    | Eschweilera sp. | 19.65    | 16.60                      | 3.00                           | 20.40                           | 0.030895                        |
| 10-Dec-11                | 234X    | Eschweilera sp. | 19.65    | 16.60                      | 4.00                           | 19.25                           | 0.028432                        |
| 10-Dec-11                | 234X    | Eschweilera sp. | 19.65    | 16.60                      | 5.00                           | 18.80                           | 0.027981                        |
| 10-Dec-11                | 234X    | Eschweilera sp. | 19.65    | 16.60                      | 6.00                           | 18.95                           | 0.026967                        |
| 10-Dec-11                | 234X    | Eschweilera sp. | 19.65    | 16.60                      | 7.00                           | 18.10                           | 0.024081                        |
| 10-Dec-11                | 234X    | Eschweilera sp. | 19.65    | 16.60                      | 8.00                           | 16.90                           | 0.023380                        |
| 10-Dec-11                | 234X    | Eschweilera sp. | 19.65    | 16.60                      | 9.00                           | 17.60                           | 0.022662                        |

|           |      |                 |       |       |       |       |          |
|-----------|------|-----------------|-------|-------|-------|-------|----------|
| 10-Dec-11 | 234X | Eschweilera sp. | 19.65 | 16.60 | 10.00 | 16.35 | 0.020551 |
| 10-Dec-11 | 234X | Eschweilera sp. | 19.65 | 16.60 | 11.00 | 16.00 | 0.019610 |
| 10-Dec-11 | 234X | Eschweilera sp. | 19.65 | 16.60 | 12.00 | 15.60 | 0.017643 |
| 10-Dec-11 | 234X | Eschweilera sp. | 19.65 | 16.60 | 13.00 | 14.35 | 0.016515 |
| 10-Dec-11 | 234X | Eschweilera sp. | 19.65 | 16.60 | 14.00 | 14.65 | 0.016459 |
| 10-Dec-11 | 234X | Eschweilera sp. | 19.65 | 16.60 | 15.00 | 14.30 | 0.015509 |
| 10-Dec-11 | 234X | Eschweilera sp. | 19.65 | 16.60 | 16.00 | 13.80 | 0.008686 |
| 10-Dec-11 | 234X | Eschweilera sp. | 19.65 | 16.60 | 16.60 | 13.35 | 0        |
| 10-Dec-11 | 1005 | Eschweilera sp. | 47.15 | 11.00 | 0.00  | 49.30 | 0.091466 |
| 10-Dec-11 | 1005 | Eschweilera sp. | 47.15 | 11.00 | 0.5   | 47.20 | 0.086199 |
| 10-Dec-11 | 1005 | Eschweilera sp. | 47.15 | 11.00 | 1.00  | 46.50 | 0.051664 |
| 10-Dec-11 | 1005 | Eschweilera sp. | 47.15 | 11.00 | 1.30  | 47.15 | 0.123788 |
| 10-Dec-11 | 1005 | Eschweilera sp. | 47.15 | 11.00 | 2.00  | 47.75 | 0.157988 |
| 10-Dec-11 | 1005 | Eschweilera sp. | 47.15 | 11.00 | 3.00  | 41.75 | 0.129411 |
| 10-Dec-11 | 1005 | Eschweilera sp. | 47.15 | 11.00 | 4.00  | 39.40 | 0.109342 |
| 10-Dec-11 | 1005 | Eschweilera sp. | 47.15 | 11.00 | 5.00  | 35.10 | 0.095802 |
| 10-Dec-11 | 1005 | Eschweilera sp. | 47.15 | 11.00 | 6.00  | 34.75 | 0.097610 |
| 10-Dec-11 | 1005 | Eschweilera sp. | 47.15 | 11.00 | 7.00  | 35.75 | 0.114761 |
| 10-Dec-11 | 1005 | Eschweilera sp. | 47.15 | 11.00 | 8.00  | 40.55 | 0.145335 |
| 10-Dec-11 | 1005 | Eschweilera sp. | 47.15 | 11.00 | 9.00  | 45.35 | 0.141570 |
| 10-Dec-11 | 1005 | Eschweilera sp. | 47.15 | 11.00 | 10.00 | 39.35 | 0.116768 |
| 10-Dec-11 | 1005 | Eschweilera sp. | 47.15 | 11.00 | 11.00 | 37.75 | 0        |
| 10-Dec-11 | 282X | Eschweilera sp. | 23.25 | 13.00 | 0.00  | 27.20 | 0.026217 |
| 10-Dec-11 | 282X | Eschweilera sp. | 23.25 | 13.00 | 0.5   | 24.40 | 0.022167 |
| 10-Dec-11 | 282X | Eschweilera sp. | 23.25 | 13.00 | 1.00  | 23.10 | 0.012655 |
| 10-Dec-11 | 282X | Eschweilera sp. | 23.25 | 13.00 | 1.30  | 23.25 | 0.028104 |
| 10-Dec-11 | 282X | Eschweilera sp. | 23.25 | 13.00 | 2.00  | 21.95 | 0.038978 |
| 10-Dec-11 | 282X | Eschweilera sp. | 23.25 | 13.00 | 3.00  | 22.60 | 0.038295 |
| 10-Dec-11 | 282X | Eschweilera sp. | 23.25 | 13.00 | 4.00  | 21.55 | 0.035145 |
| 10-Dec-11 | 282X | Eschweilera sp. | 23.25 | 13.00 | 5.00  | 20.75 | 0.033011 |
| 10-Dec-11 | 282X | Eschweilera sp. | 23.25 | 13.00 | 6.00  | 20.25 | 0.031890 |

|           |      |                         |       |       |       |       |          |
|-----------|------|-------------------------|-------|-------|-------|-------|----------|
| 10-Dec-11 | 282X | Eschweilera sp.         | 23.25 | 13.00 | 7.00  | 20.05 | 0.031731 |
| 10-Dec-11 | 282X | Eschweilera sp.         | 23.25 | 13.00 | 8.00  | 20.15 | 0.032609 |
| 10-Dec-11 | 282X | Eschweilera sp.         | 23.25 | 13.00 | 9.00  | 20.60 | 0.030032 |
| 10-Dec-11 | 282X | Eschweilera sp.         | 23.25 | 13.00 | 10.00 | 18.45 | 0.026375 |
| 10-Dec-11 | 282X | Eschweilera sp.         | 23.25 | 13.00 | 11.00 | 18.20 | 0.024966 |
| 10-Dec-11 | 282X | Eschweilera sp.         | 23.25 | 13.00 | 12.00 | 17.45 | 0.022074 |
| 10-Dec-11 | 282X | Eschweilera sp.         | 23.25 | 13.00 | 13.00 | 16.05 | 0        |
| 10-Dec-11 | 293X | Eschweilera sp.         | 13.10 | 9.70  | 0.00  | 15.50 | 0.008566 |
| 10-Dec-11 | 293X | Eschweilera sp.         | 13.10 | 9.70  | 0.5   | 14.00 | 0.007270 |
| 10-Dec-11 | 293X | Eschweilera sp.         | 13.10 | 9.70  | 1.00  | 13.20 | 0.004074 |
| 10-Dec-11 | 293X | Eschweilera sp.         | 13.10 | 9.70  | 1.30  | 13.10 | 0.009435 |
| 10-Dec-11 | 293X | Eschweilera sp.         | 13.10 | 9.70  | 2.00  | 13.10 | 0.012680 |
| 10-Dec-11 | 293X | Eschweilera sp.         | 13.10 | 9.70  | 3.00  | 12.30 | 0.011882 |
| 10-Dec-11 | 293X | Eschweilera sp.         | 13.10 | 9.70  | 4.00  | 12.30 | 0.011225 |
| 10-Dec-11 | 293X | Eschweilera sp.         | 13.10 | 9.70  | 5.00  | 11.60 | 0.010660 |
| 10-Dec-11 | 293X | Eschweilera sp.         | 13.10 | 9.70  | 6.00  | 11.70 | 0.010214 |
| 10-Dec-11 | 293X | Eschweilera sp.         | 13.10 | 9.70  | 7.00  | 11.10 | 0.009504 |
| 10-Dec-11 | 293X | Eschweilera sp.         | 13.10 | 9.70  | 8.00  | 10.90 | 0.009162 |
| 10-Dec-11 | 293X | Eschweilera sp.         | 13.10 | 9.70  | 9.00  | 10.70 | 0.006783 |
| 10-Dec-11 | 293X | Eschweilera sp.         | 13.10 | 9.70  | 9.70  | 11.50 | 0        |
| 12-Sep-12 | 590  | Eschweilera pedicellata | 25.00 | 11.00 | 0.00  | 27.30 | 0.027907 |
| 12-Sep-12 | 590  | Eschweilera pedicellata | 25.00 | 11.00 | 0.5   | 26.00 | 0.026445 |
| 12-Sep-12 | 590  | Eschweilera pedicellata | 25.00 | 11.00 | 1.00  | 25.90 | 0.015266 |
| 12-Sep-12 | 590  | Eschweilera pedicellata | 25.00 | 11.00 | 1.30  | 25.00 | 0.034224 |
| 12-Sep-12 | 590  | Eschweilera pedicellata | 25.00 | 11.00 | 2.00  | 24.90 | 0.047156 |
| 12-Sep-12 | 590  | Eschweilera pedicellata | 25.00 | 11.00 | 3.00  | 24.10 | 0.044495 |
| 12-Sep-12 | 590  | Eschweilera pedicellata | 25.00 | 11.00 | 4.00  | 23.50 | 0.042461 |
| 12-Sep-12 | 590  | Eschweilera pedicellata | 25.00 | 11.00 | 5.00  | 23.00 | 0.039954 |
| 12-Sep-12 | 590  | Eschweilera pedicellata | 25.00 | 11.00 | 6.00  | 22.10 | 0.038014 |
| 12-Sep-12 | 590  | Eschweilera pedicellata | 25.00 | 11.00 | 7.00  | 21.90 | 0.036152 |
| 12-Sep-12 | 590  | Eschweilera pedicellata | 25.00 | 11.00 | 8.00  | 21.00 | 0.034636 |

|           |     |                          |       |       |       |       |          |
|-----------|-----|--------------------------|-------|-------|-------|-------|----------|
| 12-Sep-12 | 590 | Eschweilera pedicellata  | 25.00 | 11.00 | 9.00  | 21.00 | 0.033821 |
| 12-Sep-12 | 590 | Eschweilera pedicellata  | 25.00 | 11.00 | 10.00 | 20.50 | 0.032369 |
| 12-Sep-12 | 590 | Eschweilera pedicellata  | 25.00 | 11.00 | 11.00 | 20.10 | 0        |
| 12-Sep-12 | 604 | Eschweilera pedicellata  | 13.70 | 7.50  | 0.00  | 15.00 | 0.008321 |
| 12-Sep-12 | 604 | Eschweilera pedicellata  | 13.70 | 7.50  | 0.5   | 14.10 | 0.007752 |
| 12-Sep-12 | 604 | Eschweilera pedicellata  | 13.70 | 7.50  | 1.00  | 14.00 | 0.004520 |
| 12-Sep-12 | 604 | Eschweilera pedicellata  | 13.70 | 7.50  | 1.30  | 13.70 | 0.010169 |
| 12-Sep-12 | 604 | Eschweilera pedicellata  | 13.70 | 7.50  | 2.00  | 13.50 | 0.014854 |
| 12-Sep-12 | 604 | Eschweilera pedicellata  | 13.70 | 7.50  | 3.00  | 14.00 | 0.015067 |
| 12-Sep-12 | 604 | Eschweilera pedicellata  | 13.70 | 7.50  | 4.00  | 13.70 | 0.014317 |
| 12-Sep-12 | 604 | Eschweilera pedicellata  | 13.70 | 7.50  | 5.00  | 13.30 | 0.013380 |
| 12-Sep-12 | 604 | Eschweilera pedicellata  | 13.70 | 7.50  | 6.00  | 12.80 | 0.012375 |
| 12-Sep-12 | 604 | Eschweilera pedicellata  | 13.70 | 7.50  | 7.00  | 12.30 | 0.005893 |
| 12-Sep-12 | 604 | Eschweilera pedicellata  | 13.70 | 7.50  | 7.50  | 12.20 | 0        |
| 13-Sep-12 | 122 | Eschweilera wachenheimii | 18.80 | 8.50  | 0.00  | 23.10 | 0.019469 |
| 13-Sep-12 | 122 | Eschweilera wachenheimii | 18.80 | 8.50  | 0.5   | 21.40 | 0.017004 |
| 13-Sep-12 | 122 | Eschweilera wachenheimii | 18.80 | 8.50  | 1.00  | 20.20 | 0.008971 |
| 13-Sep-12 | 122 | Eschweilera wachenheimii | 18.80 | 8.50  | 1.30  | 18.80 | 0.017848 |
| 13-Sep-12 | 122 | Eschweilera wachenheimii | 18.80 | 8.50  | 2.00  | 17.20 | 0.022701 |
| 13-Sep-12 | 122 | Eschweilera wachenheimii | 18.80 | 8.50  | 3.00  | 16.80 | 0.021775 |
| 13-Sep-12 | 122 | Eschweilera wachenheimii | 18.80 | 8.50  | 4.00  | 16.50 | 0.020870 |
| 13-Sep-12 | 122 | Eschweilera wachenheimii | 18.80 | 8.50  | 5.00  | 16.10 | 0.020232 |
| 13-Sep-12 | 122 | Eschweilera wachenheimii | 18.80 | 8.50  | 6.00  | 16.00 | 0.018771 |
| 13-Sep-12 | 122 | Eschweilera wachenheimii | 18.80 | 8.50  | 7.00  | 14.90 | 0.018032 |
| 13-Sep-12 | 122 | Eschweilera wachenheimii | 18.80 | 8.50  | 8.00  | 15.40 | 0.008616 |
| 13-Sep-12 | 122 | Eschweilera wachenheimii | 18.80 | 8.50  | 8.50  | 14.20 | 0        |
| 13-Sep-12 | 116 | Eschweilera pedicellata  | 14.30 | 9.50  | 0.00  | 17.30 | 0.010413 |
| 13-Sep-12 | 116 | Eschweilera pedicellata  | 14.30 | 9.50  | 0.5   | 15.20 | 0.008608 |
| 13-Sep-12 | 116 | Eschweilera pedicellata  | 14.30 | 9.50  | 1.00  | 14.40 | 0.004852 |
| 13-Sep-12 | 116 | Eschweilera pedicellata  | 14.30 | 9.50  | 1.30  | 14.30 | 0.011086 |
| 13-Sep-12 | 116 | Eschweilera pedicellata  | 14.30 | 9.50  | 2.00  | 14.10 | 0.014342 |

|           |     |                          |       |       |      |       |          |
|-----------|-----|--------------------------|-------|-------|------|-------|----------|
| 13-Sep-12 | 116 | Eschweilera pedicellata  | 14.30 | 9.50  | 3.00 | 12.90 | 0.012869 |
| 13-Sep-12 | 116 | Eschweilera pedicellata  | 14.30 | 9.50  | 4.00 | 12.70 | 0.011802 |
| 13-Sep-12 | 116 | Eschweilera pedicellata  | 14.30 | 9.50  | 5.00 | 11.80 | 0.010936 |
| 13-Sep-12 | 116 | Eschweilera pedicellata  | 14.30 | 9.50  | 6.00 | 11.80 | 0.010220 |
| 13-Sep-12 | 116 | Eschweilera pedicellata  | 14.30 | 9.50  | 7.00 | 11.00 | 0.009081 |
| 13-Sep-12 | 116 | Eschweilera pedicellata  | 14.30 | 9.50  | 8.00 | 10.50 | 0.008178 |
| 13-Sep-12 | 116 | Eschweilera pedicellata  | 14.30 | 9.50  | 9.00 | 9.90  | 0.003772 |
| 13-Sep-12 | 116 | Eschweilera pedicellata  | 14.30 | 9.50  | 9.50 | 9.70  | 0        |
| 13-Sep-12 | 121 | Eschweilera wachenheimii | 19.80 | 7.50  | 0.00 | 21.60 | 0.017412 |
| 13-Sep-12 | 121 | Eschweilera wachenheimii | 19.80 | 7.50  | 0.5  | 20.50 | 0.016263 |
| 13-Sep-12 | 121 | Eschweilera wachenheimii | 19.80 | 7.50  | 1.00 | 20.20 | 0.009426 |
| 13-Sep-12 | 121 | Eschweilera wachenheimii | 19.80 | 7.50  | 1.30 | 19.80 | 0.021122 |
| 13-Sep-12 | 121 | Eschweilera wachenheimii | 19.80 | 7.50  | 2.00 | 19.40 | 0.029866 |
| 13-Sep-12 | 121 | Eschweilera wachenheimii | 19.80 | 7.50  | 3.00 | 19.60 | 0.028526 |
| 13-Sep-12 | 121 | Eschweilera wachenheimii | 19.80 | 7.50  | 4.00 | 18.50 | 0.026448 |
| 13-Sep-12 | 121 | Eschweilera wachenheimii | 19.80 | 7.50  | 5.00 | 18.20 | 0.025172 |
| 13-Sep-12 | 121 | Eschweilera wachenheimii | 19.80 | 7.50  | 6.00 | 17.60 | 0.023917 |
| 13-Sep-12 | 121 | Eschweilera wachenheimii | 19.80 | 7.50  | 7.00 | 17.30 | 0.011484 |
| 13-Sep-12 | 121 | Eschweilera wachenheimii | 19.80 | 7.50  | 7.50 | 16.90 | 0        |
| 3-Oct-12  | 336 | Eschweilera wachenheimii | 23.00 | 12.00 | 0.00 | 25.30 | 0.023412 |
| 3-Oct-12  | 336 | Eschweilera wachenheimii | 23.00 | 12.00 | 0.5  | 23.50 | 0.021412 |
| 3-Oct-12  | 336 | Eschweilera wachenheimii | 23.00 | 12.00 | 1.00 | 23.20 | 0.012573 |
| 3-Oct-12  | 336 | Eschweilera wachenheimii | 23.00 | 12.00 | 1.30 | 23.00 | 0.027605 |
| 3-Oct-12  | 336 | Eschweilera wachenheimii | 23.00 | 12.00 | 2.00 | 21.80 | 0.035981 |
| 3-Oct-12  | 336 | Eschweilera wachenheimii | 23.00 | 12.00 | 3.00 | 21.00 | 0.032869 |
| 3-Oct-12  | 336 | Eschweilera wachenheimii | 23.00 | 12.00 | 4.00 | 19.90 | 0.030331 |
| 3-Oct-12  | 336 | Eschweilera wachenheimii | 23.00 | 12.00 | 5.00 | 19.40 | 0.028659 |
| 3-Oct-12  | 336 | Eschweilera wachenheimii | 23.00 | 12.00 | 6.00 | 18.80 | 0.026887 |
| 3-Oct-12  | 336 | Eschweilera wachenheimii | 23.00 | 12.00 | 7.00 | 18.20 | 0.025731 |
| 3-Oct-12  | 336 | Eschweilera wachenheimii | 23.00 | 12.00 | 8.00 | 18.00 | 0.025026 |
| 3-Oct-12  | 336 | Eschweilera wachenheimii | 23.00 | 12.00 | 9.00 | 17.70 | 0.023786 |

|          |     |                              |       |       |       |       |          |
|----------|-----|------------------------------|-------|-------|-------|-------|----------|
| 3-Oct-12 | 336 | Eschweilera wachenheimii     | 23.00 | 12.00 | 10.00 | 17.10 | 0.022109 |
| 3-Oct-12 | 336 | Eschweilera wachenheimii     | 23.00 | 12.00 | 11.00 | 16.45 | 0.021579 |
| 3-Oct-12 | 336 | Eschweilera wachenheimii     | 23.00 | 12.00 | 12.00 | 16.70 | 0        |
| 3-Oct-12 | 339 | Eschweilera pseudodecolorans | 31.60 | 17.00 | 0.00  | 36.40 | 0.049931 |
| 3-Oct-12 | 339 | Eschweilera pseudodecolorans | 31.60 | 17.00 | 0.5   | 34.90 | 0.044911 |
| 3-Oct-12 | 339 | Eschweilera pseudodecolorans | 31.60 | 17.00 | 1.00  | 32.70 | 0.024361 |
| 3-Oct-12 | 339 | Eschweilera pseudodecolorans | 31.60 | 17.00 | 1.30  | 31.60 | 0.052520 |
| 3-Oct-12 | 339 | Eschweilera pseudodecolorans | 31.60 | 17.00 | 2.00  | 30.20 | 0.069759 |
| 3-Oct-12 | 339 | Eschweilera pseudodecolorans | 31.60 | 17.00 | 3.00  | 29.40 | 0.066065 |
| 3-Oct-12 | 339 | Eschweilera pseudodecolorans | 31.60 | 17.00 | 4.00  | 28.60 | 0.064242 |
| 3-Oct-12 | 339 | Eschweilera pseudodecolorans | 31.60 | 17.00 | 5.00  | 28.60 | 0.062689 |
| 3-Oct-12 | 339 | Eschweilera pseudodecolorans | 31.60 | 17.00 | 6.00  | 27.90 | 0.058984 |
| 3-Oct-12 | 339 | Eschweilera pseudodecolorans | 31.60 | 17.00 | 7.00  | 26.90 | 0.056621 |
| 3-Oct-12 | 339 | Eschweilera pseudodecolorans | 31.60 | 17.00 | 8.00  | 26.80 | 0.054956 |
| 3-Oct-12 | 339 | Eschweilera pseudodecolorans | 31.60 | 17.00 | 9.00  | 26.10 | 0.051887 |
| 3-Oct-12 | 339 | Eschweilera pseudodecolorans | 31.60 | 17.00 | 10.00 | 25.30 | 0.049094 |
| 3-Oct-12 | 339 | Eschweilera pseudodecolorans | 31.60 | 17.00 | 11.00 | 24.70 | 0.046390 |
| 3-Oct-12 | 339 | Eschweilera pseudodecolorans | 31.60 | 17.00 | 12.00 | 23.90 | 0.043751 |
| 3-Oct-12 | 339 | Eschweilera pseudodecolorans | 31.60 | 17.00 | 13.00 | 23.30 | 0.041733 |
| 3-Oct-12 | 339 | Eschweilera pseudodecolorans | 31.60 | 17.00 | 14.00 | 22.80 | 0.040118 |
| 3-Oct-12 | 339 | Eschweilera pseudodecolorans | 31.60 | 17.00 | 15.00 | 22.40 | 0.038367 |
| 3-Oct-12 | 339 | Eschweilera pseudodecolorans | 31.60 | 17.00 | 16.00 | 21.80 | 0.036479 |
| 3-Oct-12 | 339 | Eschweilera pseudodecolorans | 31.60 | 17.00 | 17.00 | 21.30 | 0        |
| 4-Oct-12 | 264 | Eschweilera wachenheimii     | 16.77 | 9.80  | 0.00  | 18.46 | 0.012602 |
| 4-Oct-12 | 264 | Eschweilera wachenheimii     | 16.77 | 9.80  | 0.5   | 17.35 | 0.011710 |
| 4-Oct-12 | 264 | Eschweilera wachenheimii     | 16.77 | 9.80  | 1.00  | 17.19 | 0.006796 |
| 4-Oct-12 | 264 | Eschweilera wachenheimii     | 16.77 | 9.80  | 1.30  | 16.77 | 0.015383 |
| 4-Oct-12 | 264 | Eschweilera wachenheimii     | 16.77 | 9.80  | 2.00  | 16.68 | 0.020872 |
| 4-Oct-12 | 264 | Eschweilera wachenheimii     | 16.77 | 9.80  | 3.00  | 15.92 | 0.019500 |
| 4-Oct-12 | 264 | Eschweilera wachenheimii     | 16.77 | 9.80  | 4.00  | 15.60 | 0.019107 |
| 4-Oct-12 | 264 | Eschweilera wachenheimii     | 16.77 | 9.80  | 5.00  | 15.60 | 0.017973 |

|          |     |                          |       |      |      |       |          |
|----------|-----|--------------------------|-------|------|------|-------|----------|
| 4-Oct-12 | 264 | Eschweilera wachenheimii | 16.77 | 9.80 | 6.00 | 14.64 | 0.016298 |
| 4-Oct-12 | 264 | Eschweilera wachenheimii | 16.77 | 9.80 | 7.00 | 14.16 | 0.015236 |
| 4-Oct-12 | 264 | Eschweilera wachenheimii | 16.77 | 9.80 | 8.00 | 13.69 | 0.015776 |
| 4-Oct-12 | 264 | Eschweilera wachenheimii | 16.77 | 9.80 | 9.00 | 14.64 | 0.015677 |
| 4-Oct-12 | 264 | Eschweilera wachenheimii | 16.77 | 9.80 | 9.80 | 16.87 | 0        |
| 4-Oct-12 | 243 | Eschweilera wachenheimii | 11.52 | 8.00 | 0.00 | 13.05 | 0.006068 |
| 4-Oct-12 | 243 | Eschweilera wachenheimii | 11.52 | 8.00 | 0.5  | 11.78 | 0.005302 |
| 4-Oct-12 | 243 | Eschweilera wachenheimii | 11.52 | 8.00 | 1.00 | 11.46 | 0.003111 |
| 4-Oct-12 | 243 | Eschweilera wachenheimii | 11.52 | 8.00 | 1.30 | 11.52 | 0.007101 |
| 4-Oct-12 | 243 | Eschweilera wachenheimii | 11.52 | 8.00 | 2.00 | 11.20 | 0.009342 |
| 4-Oct-12 | 243 | Eschweilera wachenheimii | 11.52 | 8.00 | 3.00 | 10.60 | 0.008538 |
| 4-Oct-12 | 243 | Eschweilera wachenheimii | 11.52 | 8.00 | 4.00 | 10.25 | 0.007827 |
| 4-Oct-12 | 243 | Eschweilera wachenheimii | 11.52 | 8.00 | 5.00 | 9.71  | 0.007048 |
| 4-Oct-12 | 243 | Eschweilera wachenheimii | 11.52 | 8.00 | 6.00 | 9.23  | 0.006601 |
| 4-Oct-12 | 243 | Eschweilera wachenheimii | 11.52 | 8.00 | 7.00 | 9.10  | 0.006330 |
| 4-Oct-12 | 243 | Eschweilera wachenheimii | 11.52 | 8.00 | 8.00 | 8.85  | 0        |
| 4-Oct-12 | 163 | Eschweilera wachenheimii | 24.51 | 8.00 | 0.00 | 31.51 | 0.033204 |
| 4-Oct-12 | 163 | Eschweilera wachenheimii | 24.51 | 8.00 | 0.5  | 26.42 | 0.026438 |
| 4-Oct-12 | 163 | Eschweilera wachenheimii | 24.51 | 8.00 | 1.00 | 25.46 | 0.014717 |
| 4-Oct-12 | 163 | Eschweilera wachenheimii | 24.51 | 8.00 | 1.30 | 24.51 | 0.030952 |
| 4-Oct-12 | 163 | Eschweilera wachenheimii | 24.51 | 8.00 | 2.00 | 22.92 | 0.040402 |
| 4-Oct-12 | 163 | Eschweilera wachenheimii | 24.51 | 8.00 | 3.00 | 22.44 | 0.039272 |
| 4-Oct-12 | 163 | Eschweilera wachenheimii | 24.51 | 8.00 | 4.00 | 22.28 | 0.037895 |
| 4-Oct-12 | 163 | Eschweilera wachenheimii | 24.51 | 8.00 | 5.00 | 21.65 | 0.036797 |
| 4-Oct-12 | 163 | Eschweilera wachenheimii | 24.51 | 8.00 | 6.00 | 21.65 | 0.036797 |
| 4-Oct-12 | 163 | Eschweilera wachenheimii | 24.51 | 8.00 | 7.00 | 21.65 | 0.035209 |
| 4-Oct-12 | 163 | Eschweilera wachenheimii | 24.51 | 8.00 | 8.00 | 20.69 | 0        |
| 4-Oct-12 | 268 | Eschweilera wachenheimii | 15.60 | 7.50 | 0.00 | 18.14 | 0.011338 |
| 4-Oct-12 | 268 | Eschweilera wachenheimii | 15.60 | 7.50 | 0.5  | 15.76 | 0.009554 |
| 4-Oct-12 | 268 | Eschweilera wachenheimii | 15.60 | 7.50 | 1.00 | 15.44 | 0.005674 |
| 4-Oct-12 | 268 | Eschweilera wachenheimii | 15.60 | 7.50 | 1.30 | 15.60 | 0.012327 |

|           |     |                          |       |       |       |       |          |
|-----------|-----|--------------------------|-------|-------|-------|-------|----------|
| 4-Oct-12  | 268 | Eschweilera wachenheimii | 15.60 | 7.50  | 2.00  | 14.32 | 0.015076 |
| 4-Oct-12  | 268 | Eschweilera wachenheimii | 15.60 | 7.50  | 3.00  | 13.37 | 0.013385 |
| 4-Oct-12  | 268 | Eschweilera wachenheimii | 15.60 | 7.50  | 4.00  | 12.73 | 0.012732 |
| 4-Oct-12  | 268 | Eschweilera wachenheimii | 15.60 | 7.50  | 5.00  | 12.73 | 0.012112 |
| 4-Oct-12  | 268 | Eschweilera wachenheimii | 15.60 | 7.50  | 6.00  | 12.10 | 0.011491 |
| 4-Oct-12  | 268 | Eschweilera wachenheimii | 15.60 | 7.50  | 7.00  | 12.10 | 0.005451 |
| 4-Oct-12  | 268 | Eschweilera wachenheimii | 15.60 | 7.50  | 7.50  | 11.46 | 0        |
| 9-Oct-12  | 718 | Eschweilera truncata     | 19.35 | 10.50 | 0.00  | 21.80 | 0.017343 |
| 9-Oct-12  | 718 | Eschweilera truncata     | 19.35 | 10.50 | 0.5   | 20.20 | 0.015326 |
| 9-Oct-12  | 718 | Eschweilera truncata     | 19.35 | 10.50 | 1.00  | 19.30 | 0.008799 |
| 9-Oct-12  | 718 | Eschweilera truncata     | 19.35 | 10.50 | 1.30  | 19.35 | 0.019599 |
| 9-Oct-12  | 718 | Eschweilera truncata     | 19.35 | 10.50 | 2.00  | 18.40 | 0.025322 |
| 9-Oct-12  | 718 | Eschweilera truncata     | 19.35 | 10.50 | 3.00  | 17.50 | 0.022978 |
| 9-Oct-12  | 718 | Eschweilera truncata     | 19.35 | 10.50 | 4.00  | 16.70 | 0.021005 |
| 9-Oct-12  | 718 | Eschweilera truncata     | 19.35 | 10.50 | 5.00  | 16.00 | 0.019856 |
| 9-Oct-12  | 718 | Eschweilera truncata     | 19.35 | 10.50 | 6.00  | 15.80 | 0.018757 |
| 9-Oct-12  | 718 | Eschweilera truncata     | 19.35 | 10.50 | 7.00  | 15.10 | 0.018027 |
| 9-Oct-12  | 718 | Eschweilera truncata     | 19.35 | 10.50 | 8.00  | 15.20 | 0.017103 |
| 9-Oct-12  | 718 | Eschweilera truncata     | 19.35 | 10.50 | 9.00  | 14.30 | 0.015838 |
| 9-Oct-12  | 718 | Eschweilera truncata     | 19.35 | 10.50 | 10.00 | 14.10 | 0.007535 |
| 9-Oct-12  | 718 | Eschweilera truncata     | 19.35 | 10.50 | 10.50 | 13.60 | 0        |
| 10-Oct-12 | 716 | Eschweilera wachenheimii | 15.40 | 7.50  | 0.00  | 16.80 | 0.010506 |
| 10-Oct-12 | 716 | Eschweilera wachenheimii | 15.40 | 7.50  | 0.5   | 15.90 | 0.009681 |
| 10-Oct-12 | 716 | Eschweilera wachenheimii | 15.40 | 7.50  | 1.00  | 15.50 | 0.005624 |
| 10-Oct-12 | 716 | Eschweilera wachenheimii | 15.40 | 7.50  | 1.30  | 15.40 | 0.012870 |
| 10-Oct-12 | 716 | Eschweilera wachenheimii | 15.40 | 7.50  | 2.00  | 15.20 | 0.017791 |
| 10-Oct-12 | 716 | Eschweilera wachenheimii | 15.40 | 7.50  | 3.00  | 14.90 | 0.016749 |
| 10-Oct-12 | 716 | Eschweilera wachenheimii | 15.40 | 7.50  | 4.00  | 14.30 | 0.015727 |
| 10-Oct-12 | 716 | Eschweilera wachenheimii | 15.40 | 7.50  | 5.00  | 14.00 | 0.014960 |
| 10-Oct-12 | 716 | Eschweilera wachenheimii | 15.40 | 7.50  | 6.00  | 13.60 | 0.014106 |
| 10-Oct-12 | 716 | Eschweilera wachenheimii | 15.40 | 7.50  | 7.00  | 13.20 | 0.006791 |



|           |     |                          |       |       |      |       |          |
|-----------|-----|--------------------------|-------|-------|------|-------|----------|
| 10-Oct-12 | 716 | Eschweilera wachenheimii | 15.40 | 7.50  | 7.50 | 13.10 | 0        |
| 10-Oct-12 | 656 | Eschweilera wachenheimii | 17.00 | 7.00  | 0.00 | 19.70 | 0.013841 |
| 10-Oct-12 | 656 | Eschweilera wachenheimii | 17.00 | 7.00  | 0.5  | 17.80 | 0.011896 |
| 10-Oct-12 | 656 | Eschweilera wachenheimii | 17.00 | 7.00  | 1.00 | 17.00 | 0.006809 |
| 10-Oct-12 | 656 | Eschweilera wachenheimii | 17.00 | 7.00  | 1.30 | 17.00 | 0.015703 |
| 10-Oct-12 | 656 | Eschweilera wachenheimii | 17.00 | 7.00  | 2.00 | 16.80 | 0.021646 |
| 10-Oct-12 | 656 | Eschweilera wachenheimii | 17.00 | 7.00  | 3.00 | 16.40 | 0.020615 |
| 10-Oct-12 | 656 | Eschweilera wachenheimii | 17.00 | 7.00  | 4.00 | 16.00 | 0.019246 |
| 10-Oct-12 | 656 | Eschweilera wachenheimii | 17.00 | 7.00  | 5.00 | 15.30 | 0.018506 |
| 10-Oct-12 | 656 | Eschweilera wachenheimii | 17.00 | 7.00  | 6.00 | 15.40 | 0.020662 |
| 10-Oct-12 | 656 | Eschweilera wachenheimii | 17.00 | 7.00  | 7.00 | 17.00 | 0        |
| 10-Oct-12 | 719 | Eschweilera wachenheimii | 12.70 | 9.00  | 0.00 | 14.60 | 0.007817 |
| 10-Oct-12 | 719 | Eschweilera wachenheimii | 12.70 | 9.00  | 0.5  | 13.60 | 0.006899 |
| 10-Oct-12 | 719 | Eschweilera wachenheimii | 12.70 | 9.00  | 1.00 | 12.90 | 0.003861 |
| 10-Oct-12 | 719 | Eschweilera wachenheimii | 12.70 | 9.00  | 1.30 | 12.70 | 0.008458 |
| 10-Oct-12 | 719 | Eschweilera wachenheimii | 12.70 | 9.00  | 2.00 | 12.10 | 0.011125 |
| 10-Oct-12 | 719 | Eschweilera wachenheimii | 12.70 | 9.00  | 3.00 | 11.70 | 0.010390 |
| 10-Oct-12 | 719 | Eschweilera wachenheimii | 12.70 | 9.00  | 4.00 | 11.30 | 0.009766 |
| 10-Oct-12 | 719 | Eschweilera wachenheimii | 12.70 | 9.00  | 5.00 | 11.00 | 0.009332 |
| 10-Oct-12 | 719 | Eschweilera wachenheimii | 12.70 | 9.00  | 6.00 | 10.80 | 0.008828 |
| 10-Oct-12 | 719 | Eschweilera wachenheimii | 12.70 | 9.00  | 7.00 | 10.40 | 0.007717 |
| 10-Oct-12 | 719 | Eschweilera wachenheimii | 12.70 | 9.00  | 8.00 | 9.40  | 0.006866 |
| 10-Oct-12 | 719 | Eschweilera wachenheimii | 12.70 | 9.00  | 9.00 | 9.30  | 0        |
| 11-Oct-12 | 623 | Eschweilera truncata     | 42.80 | 13.00 | 0.00 | 50.00 | 0.091543 |
| 11-Oct-12 | 623 | Eschweilera truncata     | 42.80 | 13.00 | 0.5  | 46.50 | 0.081163 |
| 11-Oct-12 | 623 | Eschweilera truncata     | 42.80 | 13.00 | 1.00 | 44.40 | 0.044805 |
| 11-Oct-12 | 623 | Eschweilera truncata     | 42.80 | 13.00 | 1.30 | 42.80 | 0.096564 |
| 11-Oct-12 | 623 | Eschweilera truncata     | 42.80 | 13.00 | 2.00 | 41.00 | 0.128845 |
| 11-Oct-12 | 623 | Eschweilera truncata     | 42.80 | 13.00 | 3.00 | 40.00 | 0.120738 |
| 11-Oct-12 | 623 | Eschweilera truncata     | 42.80 | 13.00 | 4.00 | 38.40 | 0.113129 |
| 11-Oct-12 | 623 | Eschweilera truncata     | 42.80 | 13.00 | 5.00 | 37.50 | 0.110152 |

|           |     |                           |       |       |       |       |          |
|-----------|-----|---------------------------|-------|-------|-------|-------|----------|
| 11-Oct-12 | 623 | Eschweilera truncata      | 42.80 | 13.00 | 6.00  | 37.40 | 0.108690 |
| 11-Oct-12 | 623 | Eschweilera truncata      | 42.80 | 13.00 | 7.00  | 37.00 | 0.106941 |
| 11-Oct-12 | 623 | Eschweilera truncata      | 42.80 | 13.00 | 8.00  | 36.80 | 0.105212 |
| 11-Oct-12 | 623 | Eschweilera truncata      | 42.80 | 13.00 | 9.00  | 36.40 | 0.101243 |
| 11-Oct-12 | 623 | Eschweilera truncata      | 42.80 | 13.00 | 10.00 | 35.40 | 0.098145 |
| 11-Oct-12 | 623 | Eschweilera truncata      | 42.80 | 13.00 | 11.00 | 35.30 | 0.098424 |
| 11-Oct-12 | 623 | Eschweilera truncata      | 42.80 | 13.00 | 12.00 | 35.50 | 0.098424 |
| 11-Oct-12 | 623 | Eschweilera truncata      | 42.80 | 13.00 | 13.00 | 35.30 | 0        |
| 11-Oct-12 | 642 | Eschweilera atropetiolata | 20.50 | 10.00 | 0.00  | 21.90 | 0.018325 |
| 11-Oct-12 | 642 | Eschweilera atropetiolata | 20.50 | 10.00 | 0.5   | 21.30 | 0.017485 |
| 11-Oct-12 | 642 | Eschweilera atropetiolata | 20.50 | 10.00 | 1.00  | 20.90 | 0.010097 |
| 11-Oct-12 | 642 | Eschweilera atropetiolata | 20.50 | 10.00 | 1.30  | 20.50 | 0.022880 |
| 11-Oct-12 | 642 | Eschweilera atropetiolata | 20.50 | 10.00 | 2.00  | 20.30 | 0.030210 |
| 11-Oct-12 | 642 | Eschweilera atropetiolata | 20.50 | 10.00 | 3.00  | 18.90 | 0.026054 |
| 11-Oct-12 | 642 | Eschweilera atropetiolata | 20.50 | 10.00 | 4.00  | 17.50 | 0.023242 |
| 11-Oct-12 | 642 | Eschweilera atropetiolata | 20.50 | 10.00 | 5.00  | 16.90 | 0.021778 |
| 11-Oct-12 | 642 | Eschweilera atropetiolata | 20.50 | 10.00 | 6.00  | 16.40 | 0.020741 |
| 11-Oct-12 | 642 | Eschweilera atropetiolata | 20.50 | 10.00 | 7.00  | 16.10 | 0.020107 |
| 11-Oct-12 | 642 | Eschweilera atropetiolata | 20.50 | 10.00 | 8.00  | 15.90 | 0.019001 |
| 11-Oct-12 | 642 | Eschweilera atropetiolata | 20.50 | 10.00 | 9.00  | 15.20 | 0.017909 |
| 11-Oct-12 | 642 | Eschweilera atropetiolata | 20.50 | 10.00 | 10.00 | 15.00 | 0        |
| 16-Oct-12 | 451 | Eschweilera micrantha     | 34.40 | 11.00 | 0.00  | 38.00 | 0.053659 |
| 16-Oct-12 | 451 | Eschweilera micrantha     | 34.40 | 11.00 | 0.5   | 35.90 | 0.048948 |
| 16-Oct-12 | 451 | Eschweilera micrantha     | 34.40 | 11.00 | 1.00  | 34.70 | 0.028126 |
| 16-Oct-12 | 451 | Eschweilera micrantha     | 34.40 | 11.00 | 1.30  | 34.40 | 0.062465 |
| 16-Oct-12 | 451 | Eschweilera micrantha     | 34.40 | 11.00 | 2.00  | 33.00 | 0.082726 |
| 16-Oct-12 | 451 | Eschweilera micrantha     | 34.40 | 11.00 | 3.00  | 31.90 | 0.078434 |
| 16-Oct-12 | 451 | Eschweilera micrantha     | 34.40 | 11.00 | 4.00  | 31.30 | 0.075725 |
| 16-Oct-12 | 451 | Eschweilera micrantha     | 34.40 | 11.00 | 5.00  | 30.80 | 0.073545 |
| 16-Oct-12 | 451 | Eschweilera micrantha     | 34.40 | 11.00 | 6.00  | 30.40 | 0.072583 |
| 16-Oct-12 | 451 | Eschweilera micrantha     | 34.40 | 11.00 | 7.00  | 30.40 | 0.071399 |

|           |     |                          |       |       |       |       |          |
|-----------|-----|--------------------------|-------|-------|-------|-------|----------|
| 16-Oct-12 | 451 | Eschweilera micrantha    | 34.40 | 11.00 | 8.00  | 29.90 | 0.068362 |
| 16-Oct-12 | 451 | Eschweilera micrantha    | 34.40 | 11.00 | 9.00  | 29.10 | 0.067197 |
| 16-Oct-12 | 451 | Eschweilera micrantha    | 34.40 | 11.00 | 10.00 | 29.40 | 0.066290 |
| 16-Oct-12 | 451 | Eschweilera micrantha    | 34.40 | 11.00 | 11.00 | 28.70 | 0        |
| 16-Oct-12 | 465 | Eschweilera wachenheimii | 15.40 | 9.00  | 0.00  | 17.20 | 0.011026 |
| 16-Oct-12 | 465 | Eschweilera wachenheimii | 15.40 | 9.00  | 0.5   | 16.30 | 0.010057 |
| 16-Oct-12 | 465 | Eschweilera wachenheimii | 15.40 | 9.00  | 1.00  | 15.70 | 0.005698 |
| 16-Oct-12 | 465 | Eschweilera wachenheimii | 15.40 | 9.00  | 1.30  | 15.40 | 0.012870 |
| 16-Oct-12 | 465 | Eschweilera wachenheimii | 15.40 | 9.00  | 2.00  | 15.20 | 0.017909 |
| 16-Oct-12 | 465 | Eschweilera wachenheimii | 15.40 | 9.00  | 3.00  | 15.00 | 0.018392 |
| 16-Oct-12 | 465 | Eschweilera wachenheimii | 15.40 | 9.00  | 4.00  | 15.60 | 0.017587 |
| 16-Oct-12 | 465 | Eschweilera wachenheimii | 15.40 | 9.00  | 5.00  | 14.30 | 0.016749 |
| 16-Oct-12 | 465 | Eschweilera wachenheimii | 15.40 | 9.00  | 6.00  | 14.90 | 0.017437 |
| 16-Oct-12 | 465 | Eschweilera wachenheimii | 15.40 | 9.00  | 7.00  | 14.90 | 0.016089 |
| 16-Oct-12 | 465 | Eschweilera wachenheimii | 15.40 | 9.00  | 8.00  | 13.70 | 0.014317 |
| 16-Oct-12 | 465 | Eschweilera wachenheimii | 15.40 | 9.00  | 9.00  | 13.30 | 0        |
| 17-Oct-12 | 355 | Eschweilera truncata     | 23.80 | 10.50 | 0.00  | 26.50 | 0.026060 |
| 17-Oct-12 | 355 | Eschweilera truncata     | 23.80 | 10.50 | 0.5   | 25.00 | 0.024251 |
| 17-Oct-12 | 355 | Eschweilera truncata     | 23.80 | 10.50 | 1.00  | 24.70 | 0.013861 |
| 17-Oct-12 | 355 | Eschweilera truncata     | 23.80 | 10.50 | 1.30  | 23.80 | 0.030366 |
| 17-Oct-12 | 355 | Eschweilera truncata     | 23.80 | 10.50 | 2.00  | 23.20 | 0.041372 |
| 17-Oct-12 | 355 | Eschweilera truncata     | 23.80 | 10.50 | 3.00  | 22.70 | 0.039589 |
| 17-Oct-12 | 355 | Eschweilera truncata     | 23.80 | 10.50 | 4.00  | 22.20 | 0.037846 |
| 17-Oct-12 | 355 | Eschweilera truncata     | 23.80 | 10.50 | 5.00  | 21.70 | 0.035645 |
| 17-Oct-12 | 355 | Eschweilera truncata     | 23.80 | 10.50 | 6.00  | 20.90 | 0.033657 |
| 17-Oct-12 | 355 | Eschweilera truncata     | 23.80 | 10.50 | 7.00  | 20.50 | 0.032686 |
| 17-Oct-12 | 355 | Eschweilera truncata     | 23.80 | 10.50 | 8.00  | 20.30 | 0.032206 |
| 17-Oct-12 | 355 | Eschweilera truncata     | 23.80 | 10.50 | 9.00  | 20.20 | 0.030651 |
| 17-Oct-12 | 355 | Eschweilera truncata     | 23.80 | 10.50 | 10.00 | 19.30 | 0.014628 |
| 17-Oct-12 | 355 | Eschweilera truncata     | 23.80 | 10.50 | 10.50 | 19.30 | 0        |
| 17-Oct-12 | 352 | Eschweilera truncata     | 38.30 | 15.00 | 0.00  | 47.00 | 0.077681 |

|           |     |                          |       |       |       |       |          |
|-----------|-----|--------------------------|-------|-------|-------|-------|----------|
| 17-Oct-12 | 352 | Eschweilera truncata     | 38.30 | 15.00 | 0.5   | 41.80 | 0.066196 |
| 17-Oct-12 | 352 | Eschweilera truncata     | 38.30 | 15.00 | 1.00  | 40.30 | 0.036415 |
| 17-Oct-12 | 352 | Eschweilera truncata     | 38.30 | 15.00 | 1.30  | 38.30 | 0.078159 |
| 17-Oct-12 | 352 | Eschweilera truncata     | 38.30 | 15.00 | 2.00  | 37.10 | 0.099715 |
| 17-Oct-12 | 352 | Eschweilera truncata     | 38.30 | 15.00 | 3.00  | 34.10 | 0.086633 |
| 17-Oct-12 | 352 | Eschweilera truncata     | 38.30 | 15.00 | 4.00  | 32.30 | 0.077501 |
| 17-Oct-12 | 352 | Eschweilera truncata     | 38.30 | 15.00 | 5.00  | 30.50 | 0.072347 |
| 17-Oct-12 | 352 | Eschweilera truncata     | 38.30 | 15.00 | 6.00  | 30.20 | 0.069529 |
| 17-Oct-12 | 352 | Eschweilera truncata     | 38.30 | 15.00 | 7.00  | 29.30 | 0.064942 |
| 17-Oct-12 | 352 | Eschweilera truncata     | 38.30 | 15.00 | 8.00  | 28.20 | 0.064712 |
| 17-Oct-12 | 352 | Eschweilera truncata     | 38.30 | 15.00 | 9.00  | 29.20 | 0.062323 |
| 17-Oct-12 | 352 | Eschweilera truncata     | 38.30 | 15.00 | 10.00 | 27.10 | 0.057680 |
| 17-Oct-12 | 352 | Eschweilera truncata     | 38.30 | 15.00 | 11.00 | 27.10 | 0.056003 |
| 17-Oct-12 | 352 | Eschweilera truncata     | 38.30 | 15.00 | 12.00 | 26.30 | 0.056003 |
| 17-Oct-12 | 352 | Eschweilera truncata     | 38.30 | 15.00 | 13.00 | 27.10 | 0.054980 |
| 17-Oct-12 | 352 | Eschweilera truncata     | 38.30 | 15.00 | 14.00 | 25.80 | 0.049711 |
| 17-Oct-12 | 352 | Eschweilera truncata     | 38.30 | 15.00 | 15.00 | 24.50 | 0        |
| 17-Oct-12 | 337 | Eschweilera wachenheimii | 12.40 | 10.00 | 0.00  | 14.00 | 0.007167 |
| 17-Oct-12 | 337 | Eschweilera wachenheimii | 12.40 | 10.00 | 0.5   | 13.00 | 0.006535 |
| 17-Oct-12 | 337 | Eschweilera wachenheimii | 12.40 | 10.00 | 1.00  | 12.80 | 0.003742 |
| 17-Oct-12 | 337 | Eschweilera wachenheimii | 12.40 | 10.00 | 1.30  | 12.40 | 0.007926 |
| 17-Oct-12 | 337 | Eschweilera wachenheimii | 12.40 | 10.00 | 2.00  | 11.60 | 0.010299 |
| 17-Oct-12 | 337 | Eschweilera wachenheimii | 12.40 | 10.00 | 3.00  | 11.30 | 0.009680 |
| 17-Oct-12 | 337 | Eschweilera wachenheimii | 12.40 | 10.00 | 4.00  | 10.90 | 0.008995 |
| 17-Oct-12 | 337 | Eschweilera wachenheimii | 12.40 | 10.00 | 5.00  | 10.50 | 0.008415 |
| 17-Oct-12 | 337 | Eschweilera wachenheimii | 12.40 | 10.00 | 6.00  | 10.20 | 0.007781 |
| 17-Oct-12 | 337 | Eschweilera wachenheimii | 12.40 | 10.00 | 7.00  | 9.70  | 0.007091 |
| 17-Oct-12 | 337 | Eschweilera wachenheimii | 12.40 | 10.00 | 8.00  | 9.30  | 0.006438 |
| 17-Oct-12 | 337 | Eschweilera wachenheimii | 12.40 | 10.00 | 9.00  | 8.80  | 0.005746 |
| 17-Oct-12 | 337 | Eschweilera wachenheimii | 12.40 | 10.00 | 10.00 | 8.30  | 0        |
| 17-Oct-12 | 281 | Eschweilera wachenheimii | 15.70 | 8.00  | 0.00  | 18.70 | 0.013228 |

|           |     |                          |       |       |       |       |          |
|-----------|-----|--------------------------|-------|-------|-------|-------|----------|
| 17-Oct-12 | 281 | Eschweilera wachenheimii | 15.70 | 8.00  | 0.5   | 18.00 | 0.011515 |
| 17-Oct-12 | 281 | Eschweilera wachenheimii | 15.70 | 8.00  | 1.00  | 16.20 | 0.005996 |
| 17-Oct-12 | 281 | Eschweilera wachenheimii | 15.70 | 8.00  | 1.30  | 15.70 | 0.013551 |
| 17-Oct-12 | 281 | Eschweilera wachenheimii | 15.70 | 8.00  | 2.00  | 15.70 | 0.018634 |
| 17-Oct-12 | 281 | Eschweilera wachenheimii | 15.70 | 8.00  | 3.00  | 15.10 | 0.016872 |
| 17-Oct-12 | 281 | Eschweilera wachenheimii | 15.70 | 8.00  | 4.00  | 14.20 | 0.015075 |
| 17-Oct-12 | 281 | Eschweilera wachenheimii | 15.70 | 8.00  | 5.00  | 13.50 | 0.013293 |
| 17-Oct-12 | 281 | Eschweilera wachenheimii | 15.70 | 8.00  | 6.00  | 12.50 | 0.011885 |
| 17-Oct-12 | 281 | Eschweilera wachenheimii | 15.70 | 8.00  | 7.00  | 12.10 | 0.011404 |
| 17-Oct-12 | 281 | Eschweilera wachenheimii | 15.70 | 8.00  | 8.00  | 12.00 | 0        |
| 18-Oct-12 | 195 | Eschweilera wachenheimii | 19.40 | 10.70 | 0.00  | 21.90 | 0.017994 |
| 18-Oct-12 | 195 | Eschweilera wachenheimii | 19.40 | 10.70 | 0.5   | 20.90 | 0.016668 |
| 18-Oct-12 | 195 | Eschweilera wachenheimii | 19.40 | 10.70 | 1.00  | 20.30 | 0.009289 |
| 18-Oct-12 | 195 | Eschweilera wachenheimii | 19.40 | 10.70 | 1.30  | 19.40 | 0.019958 |
| 18-Oct-12 | 195 | Eschweilera wachenheimii | 19.40 | 10.70 | 2.00  | 18.70 | 0.027028 |
| 18-Oct-12 | 195 | Eschweilera wachenheimii | 19.40 | 10.70 | 3.00  | 18.40 | 0.025185 |
| 18-Oct-12 | 195 | Eschweilera wachenheimii | 19.40 | 10.70 | 4.00  | 17.40 | 0.023779 |
| 18-Oct-12 | 195 | Eschweilera wachenheimii | 19.40 | 10.70 | 5.00  | 17.40 | 0.022711 |
| 18-Oct-12 | 195 | Eschweilera wachenheimii | 19.40 | 10.70 | 6.00  | 16.60 | 0.022037 |
| 18-Oct-12 | 195 | Eschweilera wachenheimii | 19.40 | 10.70 | 7.00  | 16.90 | 0.021144 |
| 18-Oct-12 | 195 | Eschweilera wachenheimii | 19.40 | 10.70 | 8.00  | 15.90 | 0.019607 |
| 18-Oct-12 | 195 | Eschweilera wachenheimii | 19.40 | 10.70 | 9.00  | 15.70 | 0.018515 |
| 18-Oct-12 | 195 | Eschweilera wachenheimii | 19.40 | 10.70 | 10.00 | 15.00 | 0.012370 |
| 18-Oct-12 | 195 | Eschweilera wachenheimii | 19.40 | 10.70 | 10.70 | 15.00 | 0        |
| 18-Oct-12 | 444 | Eschweilera wachenheimii | 11.50 | 8.00  | 0.00  | 12.80 | 0.006334 |
| 18-Oct-12 | 444 | Eschweilera wachenheimii | 11.50 | 8.00  | 0.5   | 12.60 | 0.005898 |
| 18-Oct-12 | 444 | Eschweilera wachenheimii | 11.50 | 8.00  | 1.00  | 11.90 | 0.003226 |
| 18-Oct-12 | 444 | Eschweilera wachenheimii | 11.50 | 8.00  | 1.30  | 11.50 | 0.007084 |
| 18-Oct-12 | 444 | Eschweilera wachenheimii | 11.50 | 8.00  | 2.00  | 11.20 | 0.009338 |
| 18-Oct-12 | 444 | Eschweilera wachenheimii | 11.50 | 8.00  | 3.00  | 10.60 | 0.008742 |
| 18-Oct-12 | 444 | Eschweilera wachenheimii | 11.50 | 8.00  | 4.00  | 10.50 | 0.009705 |

|           |     |                          |       |      |      |       |          |
|-----------|-----|--------------------------|-------|------|------|-------|----------|
| 18-Oct-12 | 444 | Eschweilera wachenheimii | 11.50 | 8.00 | 5.00 | 11.70 | 0.009225 |
| 18-Oct-12 | 444 | Eschweilera wachenheimii | 11.50 | 8.00 | 6.00 | 9.90  | 0.007245 |
| 18-Oct-12 | 444 | Eschweilera wachenheimii | 11.50 | 8.00 | 7.00 | 9.30  | 0.006793 |
| 18-Oct-12 | 444 | Eschweilera wachenheimii | 11.50 | 8.00 | 8.00 | 9.30  | 0        |
| 18-Oct-12 | 512 | Eschweilera wachenheimii | 17.40 | 8.00 | 0.00 | 18.40 | 0.013223 |
| 18-Oct-12 | 512 | Eschweilera wachenheimii | 17.40 | 8.00 | 0.5  | 18.30 | 0.012589 |
| 18-Oct-12 | 512 | Eschweilera wachenheimii | 17.40 | 8.00 | 1.00 | 17.50 | 0.007175 |
| 18-Oct-12 | 512 | Eschweilera wachenheimii | 17.40 | 8.00 | 1.30 | 17.40 | 0.016174 |
| 18-Oct-12 | 512 | Eschweilera wachenheimii | 17.40 | 8.00 | 2.00 | 16.90 | 0.021650 |
| 18-Oct-12 | 512 | Eschweilera wachenheimii | 17.40 | 8.00 | 3.00 | 16.30 | 0.020113 |
| 18-Oct-12 | 512 | Eschweilera wachenheimii | 17.40 | 8.00 | 4.00 | 15.70 | 0.018398 |
| 18-Oct-12 | 512 | Eschweilera wachenheimii | 17.40 | 8.00 | 5.00 | 14.90 | 0.016975 |
| 18-Oct-12 | 512 | Eschweilera wachenheimii | 17.40 | 8.00 | 6.00 | 14.50 | 0.016064 |
| 18-Oct-12 | 512 | Eschweilera wachenheimii | 17.40 | 8.00 | 7.00 | 14.10 | 0.014964 |
| 18-Oct-12 | 512 | Eschweilera wachenheimii | 17.40 | 8.00 | 8.00 | 13.50 | 0        |
| 18-Oct-12 | 533 | Eschweilera wachenheimii | 15.80 | 7.00 | 0.00 | 17.10 | 0.011087 |
| 18-Oct-12 | 533 | Eschweilera wachenheimii | 15.80 | 7.00 | 0.5  | 16.50 | 0.010372 |
| 18-Oct-12 | 533 | Eschweilera wachenheimii | 15.80 | 7.00 | 1.00 | 16.00 | 0.005957 |
| 18-Oct-12 | 533 | Eschweilera wachenheimii | 15.80 | 7.00 | 1.30 | 15.80 | 0.013382 |
| 18-Oct-12 | 533 | Eschweilera wachenheimii | 15.80 | 7.00 | 2.00 | 15.40 | 0.018627 |
| 18-Oct-12 | 533 | Eschweilera wachenheimii | 15.80 | 7.00 | 3.00 | 15.40 | 0.018267 |
| 18-Oct-12 | 533 | Eschweilera wachenheimii | 15.80 | 7.00 | 4.00 | 15.10 | 0.017440 |
| 18-Oct-12 | 533 | Eschweilera wachenheimii | 15.80 | 7.00 | 5.00 | 14.70 | 0.015643 |
| 18-Oct-12 | 533 | Eschweilera wachenheimii | 15.80 | 7.00 | 6.00 | 13.50 | 0.013293 |
| 18-Oct-12 | 533 | Eschweilera wachenheimii | 15.80 | 7.00 | 7.00 | 12.50 | 0        |
| 18-Oct-12 | 531 | Eschweilera wachenheimii | 13.20 | 8.00 | 0.00 | 15.50 | 0.008846 |
| 18-Oct-12 | 531 | Eschweilera wachenheimii | 13.20 | 8.00 | 0.5  | 14.50 | 0.007760 |
| 18-Oct-12 | 531 | Eschweilera wachenheimii | 13.20 | 8.00 | 1.00 | 13.60 | 0.004232 |
| 18-Oct-12 | 531 | Eschweilera wachenheimii | 13.20 | 8.00 | 1.30 | 13.20 | 0.009293 |
| 18-Oct-12 | 531 | Eschweilera wachenheimii | 13.20 | 8.00 | 2.00 | 12.80 | 0.012668 |
| 18-Oct-12 | 531 | Eschweilera wachenheimii | 13.20 | 8.00 | 3.00 | 12.60 | 0.012176 |

|           |     |                          |       |       |       |       |          |
|-----------|-----|--------------------------|-------|-------|-------|-------|----------|
| 18-Oct-12 | 531 | Eschweilera wachenheimii | 13.20 | 8.00  | 4.00  | 12.30 | 0.011882 |
| 18-Oct-12 | 531 | Eschweilera wachenheimii | 13.20 | 8.00  | 5.00  | 12.30 | 0.011502 |
| 18-Oct-12 | 531 | Eschweilera wachenheimii | 13.20 | 8.00  | 6.00  | 11.90 | 0.010754 |
| 18-Oct-12 | 531 | Eschweilera wachenheimii | 13.20 | 8.00  | 7.00  | 11.50 | 0.010387 |
| 18-Oct-12 | 531 | Eschweilera wachenheimii | 13.20 | 8.00  | 8.00  | 11.50 | 0        |
| 18-Oct-12 | 515 | Eschweilera wachenheimii | 18.60 | 8.00  | 0.00  | 20.40 | 0.016025 |
| 18-Oct-12 | 515 | Eschweilera wachenheimii | 18.60 | 8.00  | 0.5   | 20.00 | 0.015168 |
| 18-Oct-12 | 515 | Eschweilera wachenheimii | 18.60 | 8.00  | 1.00  | 19.30 | 0.008464 |
| 18-Oct-12 | 515 | Eschweilera wachenheimii | 18.60 | 8.00  | 1.30  | 18.60 | 0.018516 |
| 18-Oct-12 | 515 | Eschweilera wachenheimii | 18.60 | 8.00  | 2.00  | 18.10 | 0.025448 |
| 18-Oct-12 | 515 | Eschweilera wachenheimii | 18.60 | 8.00  | 3.00  | 17.90 | 0.024200 |
| 18-Oct-12 | 515 | Eschweilera wachenheimii | 18.60 | 8.00  | 4.00  | 17.20 | 0.022439 |
| 18-Oct-12 | 515 | Eschweilera wachenheimii | 18.60 | 8.00  | 5.00  | 16.60 | 0.020874 |
| 18-Oct-12 | 515 | Eschweilera wachenheimii | 18.60 | 8.00  | 6.00  | 16.00 | 0.019610 |
| 18-Oct-12 | 515 | Eschweilera wachenheimii | 18.60 | 8.00  | 7.00  | 15.60 | 0.018630 |
| 18-Oct-12 | 515 | Eschweilera wachenheimii | 18.60 | 8.00  | 8.00  | 15.20 | 0        |
| 12-Nov-12 | 77  | Eschweilera truncata     | 21.80 | 12.00 | 0.00  | 26.50 | 0.023996 |
| 12-Nov-12 | 77  | Eschweilera truncata     | 21.80 | 12.00 | 0.5   | 22.80 | 0.020325 |
| 12-Nov-12 | 77  | Eschweilera truncata     | 21.80 | 12.00 | 1.00  | 22.70 | 0.011669 |
| 12-Nov-12 | 77  | Eschweilera truncata     | 21.80 | 12.00 | 1.30  | 21.80 | 0.025535 |
| 12-Nov-12 | 77  | Eschweilera truncata     | 21.80 | 12.00 | 2.00  | 21.30 | 0.033524 |
| 12-Nov-12 | 77  | Eschweilera truncata     | 21.80 | 12.00 | 3.00  | 20.00 | 0.029736 |
| 12-Nov-12 | 77  | Eschweilera truncata     | 21.80 | 12.00 | 4.00  | 18.90 | 0.028055 |
| 12-Nov-12 | 77  | Eschweilera truncata     | 21.80 | 12.00 | 5.00  | 18.90 | 0.027760 |
| 12-Nov-12 | 77  | Eschweilera truncata     | 21.80 | 12.00 | 6.00  | 18.70 | 0.026175 |
| 12-Nov-12 | 77  | Eschweilera truncata     | 21.80 | 12.00 | 7.00  | 17.80 | 0.024469 |
| 12-Nov-12 | 77  | Eschweilera truncata     | 21.80 | 12.00 | 8.00  | 17.50 | 0.023916 |
| 12-Nov-12 | 77  | Eschweilera truncata     | 21.80 | 12.00 | 9.00  | 17.40 | 0.022973 |
| 12-Nov-12 | 77  | Eschweilera truncata     | 21.80 | 12.00 | 10.00 | 16.80 | 0.021646 |
| 12-Nov-12 | 77  | Eschweilera truncata     | 21.80 | 12.00 | 11.00 | 16.40 | 0.020615 |
| 12-Nov-12 | 77  | Eschweilera truncata     | 21.80 | 12.00 | 12.00 | 16.00 | 0        |

|           |     |                              |       |       |       |       |          |
|-----------|-----|------------------------------|-------|-------|-------|-------|----------|
| 12-Nov-12 | 68  | Eschweilera pedicellata      | 16.30 | 9.00  | 0.00  | 17.50 | 0.011359 |
| 12-Nov-12 | 68  | Eschweilera pedicellata      | 16.30 | 9.00  | 0.5   | 16.50 | 0.010627 |
| 12-Nov-12 | 68  | Eschweilera pedicellata      | 16.30 | 9.00  | 1.00  | 16.40 | 0.006299 |
| 12-Nov-12 | 68  | Eschweilera pedicellata      | 16.30 | 9.00  | 1.30  | 16.30 | 0.014253 |
| 12-Nov-12 | 68  | Eschweilera pedicellata      | 16.30 | 9.00  | 2.00  | 15.90 | 0.019121 |
| 12-Nov-12 | 68  | Eschweilera pedicellata      | 16.30 | 9.00  | 3.00  | 15.30 | 0.017794 |
| 12-Nov-12 | 68  | Eschweilera pedicellata      | 16.30 | 9.00  | 4.00  | 14.80 | 0.016745 |
| 12-Nov-12 | 68  | Eschweilera pedicellata      | 16.30 | 9.00  | 5.00  | 14.40 | 0.015730 |
| 12-Nov-12 | 68  | Eschweilera pedicellata      | 16.30 | 9.00  | 6.00  | 13.90 | 0.014639 |
| 12-Nov-12 | 68  | Eschweilera pedicellata      | 16.30 | 9.00  | 7.00  | 13.40 | 0.013286 |
| 12-Nov-12 | 68  | Eschweilera pedicellata      | 16.30 | 9.00  | 8.00  | 12.60 | 0.012469 |
| 12-Nov-12 | 68  | Eschweilera pedicellata      | 16.30 | 9.00  | 9.00  | 12.60 | 0        |
| 13-Nov-12 | 63  | Eschweilera pseudodecolorans | 37.70 | 11.00 | 0.00  | 39.80 | 0.060358 |
| 13-Nov-12 | 63  | Eschweilera pseudodecolorans | 37.70 | 11.00 | 0.5   | 38.60 | 0.057758 |
| 13-Nov-12 | 63  | Eschweilera pseudodecolorans | 37.70 | 11.00 | 1.00  | 38.10 | 0.033846 |
| 13-Nov-12 | 63  | Eschweilera pseudodecolorans | 37.70 | 11.00 | 1.30  | 37.70 | 0.076094 |
| 13-Nov-12 | 63  | Eschweilera pseudodecolorans | 37.70 | 11.00 | 2.00  | 36.70 | 0.102104 |
| 13-Nov-12 | 63  | Eschweilera pseudodecolorans | 37.70 | 11.00 | 3.00  | 35.40 | 0.095952 |
| 13-Nov-12 | 63  | Eschweilera pseudodecolorans | 37.70 | 11.00 | 4.00  | 34.50 | 0.091870 |
| 13-Nov-12 | 63  | Eschweilera pseudodecolorans | 37.70 | 11.00 | 5.00  | 33.90 | 0.090259 |
| 13-Nov-12 | 63  | Eschweilera pseudodecolorans | 37.70 | 11.00 | 6.00  | 33.90 | 0.087894 |
| 13-Nov-12 | 63  | Eschweilera pseudodecolorans | 37.70 | 11.00 | 7.00  | 33.00 | 0.084756 |
| 13-Nov-12 | 63  | Eschweilera pseudodecolorans | 37.70 | 11.00 | 8.00  | 32.70 | 0.081453 |
| 13-Nov-12 | 63  | Eschweilera pseudodecolorans | 37.70 | 11.00 | 9.00  | 31.70 | 0.076957 |
| 13-Nov-12 | 63  | Eschweilera pseudodecolorans | 37.70 | 11.00 | 10.00 | 30.90 | 0.074991 |
| 13-Nov-12 | 63  | Eschweilera pseudodecolorans | 37.70 | 11.00 | 11.00 | 30.90 | 0        |
| 13-Nov-12 | 150 | Eschweilera coriacea         | 18.20 | 9.00  | 0.00  | 21.10 | 0.016131 |
| 13-Nov-12 | 150 | Eschweilera coriacea         | 18.20 | 9.00  | 0.5   | 19.40 | 0.014183 |
| 13-Nov-12 | 150 | Eschweilera coriacea         | 18.20 | 9.00  | 1.00  | 18.60 | 0.007978 |
| 13-Nov-12 | 150 | Eschweilera coriacea         | 18.20 | 9.00  | 1.30  | 18.20 | 0.017815 |
| 13-Nov-12 | 150 | Eschweilera coriacea         | 18.20 | 9.00  | 2.00  | 17.80 | 0.024607 |



|           |        |                          |       |      |      |       |          |
|-----------|--------|--------------------------|-------|------|------|-------|----------|
| 13-Nov-12 | 150    | Eschweilera coriacea     | 18.20 | 9.00 | 3.00 | 17.60 | 0.023647 |
| 13-Nov-12 | 150    | Eschweilera coriacea     | 18.20 | 9.00 | 4.00 | 17.10 | 0.022699 |
| 13-Nov-12 | 150    | Eschweilera coriacea     | 18.20 | 9.00 | 5.00 | 16.90 | 0.022168 |
| 13-Nov-12 | 150    | Eschweilera coriacea     | 18.20 | 9.00 | 6.00 | 16.70 | 0.022036 |
| 13-Nov-12 | 150    | Eschweilera coriacea     | 18.20 | 9.00 | 7.00 | 16.80 | 0.020640 |
| 13-Nov-12 | 150    | Eschweilera coriacea     | 18.20 | 9.00 | 8.00 | 15.60 | 0.018991 |
| 13-Nov-12 | 150    | Eschweilera coriacea     | 18.20 | 9.00 | 9.00 | 15.50 | 0        |
| 13-Nov-12 | 87     | Eschweilera wachenheimii | 24.50 | 8.00 | 0.00 | 26.50 | 0.027577 |
| 13-Nov-12 | 87     | Eschweilera wachenheimii | 24.50 | 8.00 | 0.5  | 26.50 | 0.026456 |
| 13-Nov-12 | 87     | Eschweilera wachenheimii | 24.50 | 8.00 | 1.00 | 25.40 | 0.014672 |
| 13-Nov-12 | 87     | Eschweilera wachenheimii | 24.50 | 8.00 | 1.30 | 24.50 | 0.031810 |
| 13-Nov-12 | 87     | Eschweilera wachenheimii | 24.50 | 8.00 | 2.00 | 23.60 | 0.042107 |
| 13-Nov-12 | 87     | Eschweilera wachenheimii | 24.50 | 8.00 | 3.00 | 22.70 | 0.039764 |
| 13-Nov-12 | 87     | Eschweilera wachenheimii | 24.50 | 8.00 | 4.00 | 22.30 | 0.038882 |
| 13-Nov-12 | 87     | Eschweilera wachenheimii | 24.50 | 8.00 | 5.00 | 22.20 | 0.037846 |
| 13-Nov-12 | 87     | Eschweilera wachenheimii | 24.50 | 8.00 | 6.00 | 21.70 | 0.036141 |
| 13-Nov-12 | 87     | Eschweilera wachenheimii | 24.50 | 8.00 | 7.00 | 21.20 | 0.035466 |
| 13-Nov-12 | 87     | Eschweilera wachenheimii | 24.50 | 8.00 | 8.00 | 21.30 | 0        |
| 20-Nov-12 | 258 A3 | Eschweilera truncata     | 17.00 | 9.50 | 0.00 | 18.20 | 0.012725 |
| 20-Nov-12 | 258 A3 | Eschweilera truncata     | 17.00 | 9.50 | 0.5  | 17.80 | 0.012166 |
| 20-Nov-12 | 258 A3 | Eschweilera truncata     | 17.00 | 9.50 | 1.00 | 17.40 | 0.006972 |
| 20-Nov-12 | 258 A3 | Eschweilera truncata     | 17.00 | 9.50 | 1.30 | 17.00 | 0.015428 |
| 20-Nov-12 | 258 A3 | Eschweilera truncata     | 17.00 | 9.50 | 2.00 | 16.50 | 0.020744 |
| 20-Nov-12 | 258 A3 | Eschweilera truncata     | 17.00 | 9.50 | 3.00 | 16.00 | 0.019981 |
| 20-Nov-12 | 258 A3 | Eschweilera truncata     | 17.00 | 9.50 | 4.00 | 15.90 | 0.019001 |
| 20-Nov-12 | 258 A3 | Eschweilera truncata     | 17.00 | 9.50 | 5.00 | 15.20 | 0.018386 |
| 20-Nov-12 | 258 A3 | Eschweilera truncata     | 17.00 | 9.50 | 6.00 | 15.40 | 0.017684 |
| 20-Nov-12 | 258 A3 | Eschweilera truncata     | 17.00 | 9.50 | 7.00 | 14.60 | 0.016401 |
| 20-Nov-12 | 258 A3 | Eschweilera truncata     | 17.00 | 9.50 | 8.00 | 14.30 | 0.015082 |
| 20-Nov-12 | 258 A3 | Eschweilera truncata     | 17.00 | 9.50 | 9.00 | 13.40 | 0.007051 |
| 20-Nov-12 | 258 A3 | Eschweilera truncata     | 17.00 | 9.50 | 9.50 | 13.40 | 0        |

|           |       |                          |       |       |       |       |          |
|-----------|-------|--------------------------|-------|-------|-------|-------|----------|
| 20-Nov-12 | 269   | Eschweilera bracteosa    | 13.20 | 11.00 | 0.00  | 15.20 | 0.008552 |
| 20-Nov-12 | 269   | Eschweilera bracteosa    | 13.20 | 11.00 | 0.5   | 14.30 | 0.008316 |
| 20-Nov-12 | 269   | Eschweilera bracteosa    | 13.20 | 11.00 | 1.00  | 14.80 | 0.004633 |
| 20-Nov-12 | 269   | Eschweilera bracteosa    | 13.20 | 11.00 | 1.30  | 13.20 | 0.009435 |
| 20-Nov-12 | 269   | Eschweilera bracteosa    | 13.20 | 11.00 | 2.00  | 13.00 | 0.012871 |
| 20-Nov-12 | 269   | Eschweilera bracteosa    | 13.20 | 11.00 | 3.00  | 12.60 | 0.012273 |
| 20-Nov-12 | 269   | Eschweilera bracteosa    | 13.20 | 11.00 | 4.00  | 12.40 | 0.011506 |
| 20-Nov-12 | 269   | Eschweilera bracteosa    | 13.20 | 11.00 | 5.00  | 11.80 | 0.010844 |
| 20-Nov-12 | 269   | Eschweilera bracteosa    | 13.20 | 11.00 | 6.00  | 11.70 | 0.010041 |
| 20-Nov-12 | 269   | Eschweilera bracteosa    | 13.20 | 11.00 | 7.00  | 10.90 | 0.009417 |
| 20-Nov-12 | 269   | Eschweilera bracteosa    | 13.20 | 11.00 | 8.00  | 11.00 | 0.009081 |
| 20-Nov-12 | 269   | Eschweilera bracteosa    | 13.20 | 11.00 | 9.00  | 10.50 | 0.008415 |
| 20-Nov-12 | 269   | Eschweilera bracteosa    | 13.20 | 11.00 | 10.00 | 10.20 | 0.007781 |
| 20-Nov-12 | 269   | Eschweilera bracteosa    | 13.20 | 11.00 | 11.00 | 9.70  | 0        |
| 20-Nov-12 | 234   | Eschweilera wachenheimii | 26.30 | 11.00 | 0.00  | 29.30 | 0.031383 |
| 20-Nov-12 | 234   | Eschweilera wachenheimii | 26.30 | 11.00 | 0.5   | 27.20 | 0.028420 |
| 20-Nov-12 | 234   | Eschweilera wachenheimii | 26.30 | 11.00 | 1.00  | 26.60 | 0.016485 |
| 20-Nov-12 | 234   | Eschweilera wachenheimii | 26.30 | 11.00 | 1.30  | 26.30 | 0.036889 |
| 20-Nov-12 | 234   | Eschweilera wachenheimii | 26.30 | 11.00 | 2.00  | 25.50 | 0.048915 |
| 20-Nov-12 | 234   | Eschweilera wachenheimii | 26.30 | 11.00 | 3.00  | 24.40 | 0.045999 |
| 20-Nov-12 | 234   | Eschweilera wachenheimii | 26.30 | 11.00 | 4.00  | 24.00 | 0.044306 |
| 20-Nov-12 | 234   | Eschweilera wachenheimii | 26.30 | 11.00 | 5.00  | 23.50 | 0.042461 |
| 20-Nov-12 | 234   | Eschweilera wachenheimii | 26.30 | 11.00 | 6.00  | 23.00 | 0.041009 |
| 20-Nov-12 | 234   | Eschweilera wachenheimii | 26.30 | 11.00 | 7.00  | 22.70 | 0.039939 |
| 20-Nov-12 | 234   | Eschweilera wachenheimii | 26.30 | 11.00 | 8.00  | 22.40 | 0.038711 |
| 20-Nov-12 | 234   | Eschweilera wachenheimii | 26.30 | 11.00 | 9.00  | 22.00 | 0.036325 |
| 20-Nov-12 | 234   | Eschweilera wachenheimii | 26.30 | 11.00 | 10.00 | 21.00 | 0.034472 |
| 20-Nov-12 | 234   | Eschweilera wachenheimii | 26.30 | 11.00 | 11.00 | 20.90 | 0        |
| 20-Nov-12 | 228 B | Eschweilera wachenheimii | 16.70 | 8.50  | 0.00  | 18.30 | 0.012452 |
| 20-Nov-12 | 228 B | Eschweilera wachenheimii | 16.70 | 8.50  | 0.5   | 17.30 | 0.011484 |
| 20-Nov-12 | 228 B | Eschweilera wachenheimii | 16.70 | 8.50  | 1.00  | 16.90 | 0.006650 |

|           |       |                          |       |       |       |       |          |
|-----------|-------|--------------------------|-------|-------|-------|-------|----------|
| 20-Nov-12 | 228 B | Eschweilera wachenheimii | 16.70 | 8.50  | 1.30  | 16.70 | 0.014970 |
| 20-Nov-12 | 228 B | Eschweilera wachenheimii | 16.70 | 8.50  | 2.00  | 16.30 | 0.019747 |
| 20-Nov-12 | 228 B | Eschweilera wachenheimii | 16.70 | 8.50  | 3.00  | 15.40 | 0.019117 |
| 20-Nov-12 | 228 B | Eschweilera wachenheimii | 16.70 | 8.50  | 4.00  | 15.80 | 0.017391 |
| 20-Nov-12 | 228 B | Eschweilera wachenheimii | 16.70 | 8.50  | 5.00  | 13.90 | 0.015284 |
| 20-Nov-12 | 228 B | Eschweilera wachenheimii | 16.70 | 8.50  | 6.00  | 14.00 | 0.014031 |
| 20-Nov-12 | 228 B | Eschweilera wachenheimii | 16.70 | 8.50  | 7.00  | 12.70 | 0.012470 |
| 20-Nov-12 | 228 B | Eschweilera wachenheimii | 16.70 | 8.50  | 8.00  | 12.50 | 0.006087 |
| 20-Nov-12 | 228 B | Eschweilera wachenheimii | 16.70 | 8.50  | 8.50  | 12.40 | 0        |
| 21-Nov-12 | No ID | Eschweilera sp.          | 39.80 | 14.50 | 0.00  | 44.20 | 0.075003 |
| 21-Nov-12 | No ID | Eschweilera sp.          | 39.80 | 14.50 | 0.5   | 43.20 | 0.068691 |
| 21-Nov-12 | No ID | Eschweilera sp.          | 39.80 | 14.50 | 1.00  | 40.40 | 0.037890 |
| 21-Nov-12 | No ID | Eschweilera sp.          | 39.80 | 14.50 | 1.30  | 39.80 | 0.083447 |
| 21-Nov-12 | No ID | Eschweilera sp.          | 39.80 | 14.50 | 2.00  | 38.10 | 0.105662 |
| 21-Nov-12 | No ID | Eschweilera sp.          | 39.80 | 14.50 | 3.00  | 35.20 | 0.095398 |
| 21-Nov-12 | No ID | Eschweilera sp.          | 39.80 | 14.50 | 4.00  | 34.50 | 0.092673 |
| 21-Nov-12 | No ID | Eschweilera sp.          | 39.80 | 14.50 | 5.00  | 34.20 | 0.090530 |
| 21-Nov-12 | No ID | Eschweilera sp.          | 39.80 | 14.50 | 6.00  | 33.70 | 0.087105 |
| 21-Nov-12 | No ID | Eschweilera sp.          | 39.80 | 14.50 | 7.00  | 32.90 | 0.083476 |
| 21-Nov-12 | No ID | Eschweilera sp.          | 39.80 | 14.50 | 8.00  | 32.30 | 0.078952 |
| 21-Nov-12 | No ID | Eschweilera sp.          | 39.80 | 14.50 | 9.00  | 31.10 | 0.076455 |
| 21-Nov-12 | No ID | Eschweilera sp.          | 39.80 | 14.50 | 10.00 | 31.30 | 0.072647 |
| 21-Nov-12 | No ID | Eschweilera sp.          | 39.80 | 14.50 | 11.00 | 29.50 | 0.070228 |
| 21-Nov-12 | No ID | Eschweilera sp.          | 39.80 | 14.50 | 12.00 | 30.30 | 0.067504 |
| 21-Nov-12 | No ID | Eschweilera sp.          | 39.80 | 14.50 | 13.00 | 28.30 | 0.060079 |
| 21-Nov-12 | No ID | Eschweilera sp.          | 39.80 | 14.50 | 14.00 | 27.00 | 0.029708 |
| 21-Nov-12 | No ID | Eschweilera sp.          | 39.80 | 14.50 | 14.50 | 28.00 | 0        |
| 21-Nov-12 | 340   | Eschweilera coriacea     | 38.20 | 11.50 | 0.00  | 45.00 | 0.071650 |
| 21-Nov-12 | 340   | Eschweilera coriacea     | 38.20 | 11.50 | 0.5   | 40.30 | 0.060993 |
| 21-Nov-12 | 340   | Eschweilera coriacea     | 38.20 | 11.50 | 1.00  | 38.50 | 0.034654 |
| 21-Nov-12 | 340   | Eschweilera coriacea     | 38.20 | 11.50 | 1.30  | 38.20 | 0.078769 |

|           |     |                          |       |       |       |       |          |
|-----------|-----|--------------------------|-------|-------|-------|-------|----------|
| 21-Nov-12 | 340 | Eschweilera coriacea     | 38.20 | 11.50 | 2.00  | 37.50 | 0.107541 |
| 21-Nov-12 | 340 | Eschweilera coriacea     | 38.20 | 11.50 | 3.00  | 36.50 | 0.103494 |
| 21-Nov-12 | 340 | Eschweilera coriacea     | 38.20 | 11.50 | 4.00  | 36.10 | 0.099283 |
| 21-Nov-12 | 340 | Eschweilera coriacea     | 38.20 | 11.50 | 5.00  | 35.00 | 0.091914 |
| 21-Nov-12 | 340 | Eschweilera coriacea     | 38.20 | 11.50 | 6.00  | 33.40 | 0.088142 |
| 21-Nov-12 | 340 | Eschweilera coriacea     | 38.20 | 11.50 | 7.00  | 33.60 | 0.088668 |
| 21-Nov-12 | 340 | Eschweilera coriacea     | 38.20 | 11.50 | 8.00  | 33.60 | 0.091075 |
| 21-Nov-12 | 340 | Eschweilera coriacea     | 38.20 | 11.50 | 9.00  | 34.50 | 0.085954 |
| 21-Nov-12 | 340 | Eschweilera coriacea     | 38.20 | 11.50 | 10.00 | 31.60 | 0.080437 |
| 21-Nov-12 | 340 | Eschweilera coriacea     | 38.20 | 11.50 | 11.00 | 32.40 | 0.043578 |
| 21-Nov-12 | 340 | Eschweilera coriacea     | 38.20 | 11.50 | 11.50 | 34.20 | 0        |
| 21-Nov-12 | 300 | Eschweilera wachenheimii | 25.30 | 11.00 | 0.00  | 28.00 | 0.028667 |
| 21-Nov-12 | 300 | Eschweilera wachenheimii | 25.30 | 11.00 | 0.5   | 26.00 | 0.026649 |
| 21-Nov-12 | 300 | Eschweilera wachenheimii | 25.30 | 11.00 | 1.00  | 26.10 | 0.015566 |
| 21-Nov-12 | 300 | Eschweilera wachenheimii | 25.30 | 11.00 | 1.30  | 25.30 | 0.035052 |
| 21-Nov-12 | 300 | Eschweilera wachenheimii | 25.30 | 11.00 | 2.00  | 25.20 | 0.047182 |
| 21-Nov-12 | 300 | Eschweilera wachenheimii | 25.30 | 11.00 | 3.00  | 23.80 | 0.045242 |
| 21-Nov-12 | 300 | Eschweilera wachenheimii | 25.30 | 11.00 | 4.00  | 24.20 | 0.042352 |
| 21-Nov-12 | 300 | Eschweilera wachenheimii | 25.30 | 11.00 | 5.00  | 22.20 | 0.037506 |
| 21-Nov-12 | 300 | Eschweilera wachenheimii | 25.30 | 11.00 | 6.00  | 21.50 | 0.035142 |
| 21-Nov-12 | 300 | Eschweilera wachenheimii | 25.30 | 11.00 | 7.00  | 20.80 | 0.033493 |
| 21-Nov-12 | 300 | Eschweilera wachenheimii | 25.30 | 11.00 | 8.00  | 20.50 | 0.031436 |
| 21-Nov-12 | 300 | Eschweilera wachenheimii | 25.30 | 11.00 | 9.00  | 19.50 | 0.028228 |
| 21-Nov-12 | 300 | Eschweilera wachenheimii | 25.30 | 11.00 | 10.00 | 18.40 | 0.027175 |
| 21-Nov-12 | 300 | Eschweilera wachenheimii | 25.30 | 11.00 | 11.00 | 18.80 | 0        |
| 21-Nov-12 | 310 | Eschweilera wachenheimii | 16.00 | 7.00  | 0.00  | 19.10 | 0.012771 |
| 21-Nov-12 | 310 | Eschweilera wachenheimii | 16.00 | 7.00  | 0.5   | 16.90 | 0.010889 |
| 21-Nov-12 | 310 | Eschweilera wachenheimii | 16.00 | 7.00  | 1.00  | 16.40 | 0.006185 |
| 21-Nov-12 | 310 | Eschweilera wachenheimii | 16.00 | 7.00  | 1.30  | 16.00 | 0.014341 |
| 21-Nov-12 | 310 | Eschweilera wachenheimii | 16.00 | 7.00  | 2.00  | 16.30 | 0.018577 |
| 21-Nov-12 | 310 | Eschweilera wachenheimii | 16.00 | 7.00  | 3.00  | 14.40 | 0.015840 |

|           |       |                              |       |       |       |       |          |
|-----------|-------|------------------------------|-------|-------|-------|-------|----------|
| 21-Nov-12 | 310   | Eschweilera wachenheimii     | 16.00 | 7.00  | 4.00  | 14.00 | 0.014748 |
| 21-Nov-12 | 310   | Eschweilera wachenheimii     | 16.00 | 7.00  | 5.00  | 13.40 | 0.013998 |
| 21-Nov-12 | 310   | Eschweilera wachenheimii     | 16.00 | 7.00  | 6.00  | 13.30 | 0.013082 |
| 21-Nov-12 | 310   | Eschweilera wachenheimii     | 16.00 | 7.00  | 7.00  | 12.50 | 0        |
| 22-Nov-12 | 151   | Eschweilera wachenheimii     | 25.50 | 12.50 | 0.00  | 28.90 | 0.029981 |
| 22-Nov-12 | 151   | Eschweilera wachenheimii     | 25.50 | 12.50 | 0.5   | 26.30 | 0.026651 |
| 22-Nov-12 | 151   | Eschweilera wachenheimii     | 25.50 | 12.50 | 1.00  | 25.80 | 0.015502 |
| 22-Nov-12 | 151   | Eschweilera wachenheimii     | 25.50 | 12.50 | 1.30  | 25.50 | 0.033841 |
| 22-Nov-12 | 151   | Eschweilera wachenheimii     | 25.50 | 12.50 | 2.00  | 24.10 | 0.043763 |
| 22-Nov-12 | 151   | Eschweilera wachenheimii     | 25.50 | 12.50 | 3.00  | 23.10 | 0.041190 |
| 22-Nov-12 | 151   | Eschweilera wachenheimii     | 25.50 | 12.50 | 4.00  | 22.70 | 0.039415 |
| 22-Nov-12 | 151   | Eschweilera wachenheimii     | 25.50 | 12.50 | 5.00  | 22.10 | 0.037672 |
| 22-Nov-12 | 151   | Eschweilera wachenheimii     | 25.50 | 12.50 | 6.00  | 21.70 | 0.035645 |
| 22-Nov-12 | 151   | Eschweilera wachenheimii     | 25.50 | 12.50 | 7.00  | 20.90 | 0.034472 |
| 22-Nov-12 | 151   | Eschweilera wachenheimii     | 25.50 | 12.50 | 8.00  | 21.00 | 0.033983 |
| 22-Nov-12 | 151   | Eschweilera wachenheimii     | 25.50 | 12.50 | 9.00  | 20.60 | 0.032216 |
| 22-Nov-12 | 151   | Eschweilera wachenheimii     | 25.50 | 12.50 | 10.00 | 19.90 | 0.031734 |
| 22-Nov-12 | 151   | Eschweilera wachenheimii     | 25.50 | 12.50 | 11.00 | 20.30 | 0.031578 |
| 22-Nov-12 | 151   | Eschweilera wachenheimii     | 25.50 | 12.50 | 12.00 | 19.80 | 0.015630 |
| 22-Nov-12 | 151   | Eschweilera wachenheimii     | 25.50 | 12.50 | 12.50 | 20.10 | 0        |
| 22-Nov-12 | 329 D | Eschweilera wachenheimii     | 11.10 | 6.00  | 0.00  | 12.30 | 0.005567 |
| 22-Nov-12 | 329 D | Eschweilera wachenheimii     | 11.10 | 6.00  | 0.5   | 11.50 | 0.005060 |
| 22-Nov-12 | 329 D | Eschweilera wachenheimii     | 11.10 | 6.00  | 1.00  | 11.20 | 0.002929 |
| 22-Nov-12 | 329 D | Eschweilera wachenheimii     | 11.10 | 6.00  | 1.30  | 11.10 | 0.006534 |
| 22-Nov-12 | 329 D | Eschweilera wachenheimii     | 11.10 | 6.00  | 2.00  | 10.70 | 0.008662 |
| 22-Nov-12 | 329 D | Eschweilera wachenheimii     | 11.10 | 6.00  | 3.00  | 10.30 | 0.008015 |
| 22-Nov-12 | 329 D | Eschweilera wachenheimii     | 11.10 | 6.00  | 4.00  | 9.90  | 0.007393 |
| 22-Nov-12 | 329 D | Eschweilera wachenheimii     | 11.10 | 6.00  | 5.00  | 9.50  | 0.006868 |
| 22-Nov-12 | 329 D | Eschweilera wachenheimii     | 11.10 | 6.00  | 6.00  | 9.20  | 0        |
| 30-Nov-12 | 495   | Eschweilera pseudodecolorans | 13.10 | 10.00 | 0.00  | 14.50 | 0.007868 |
| 30-Nov-12 | 495   | Eschweilera pseudodecolorans | 13.10 | 10.00 | 0.5   | 13.80 | 0.007318 |

|           |     |                              |       |       |       |       |          |
|-----------|-----|------------------------------|-------|-------|-------|-------|----------|
| 30-Nov-12 | 495 | Eschweilera pseudodecolorans | 13.10 | 10.00 | 1.00  | 13.50 | 0.004169 |
| 30-Nov-12 | 495 | Eschweilera pseudodecolorans | 13.10 | 10.00 | 1.30  | 13.10 | 0.009013 |
| 30-Nov-12 | 495 | Eschweilera pseudodecolorans | 13.10 | 10.00 | 2.00  | 12.50 | 0.012174 |
| 30-Nov-12 | 495 | Eschweilera pseudodecolorans | 13.10 | 10.00 | 3.00  | 12.40 | 0.011788 |
| 30-Nov-12 | 495 | Eschweilera pseudodecolorans | 13.10 | 10.00 | 4.00  | 12.10 | 0.011404 |
| 30-Nov-12 | 495 | Eschweilera pseudodecolorans | 13.10 | 10.00 | 5.00  | 12.00 | 0.011031 |
| 30-Nov-12 | 495 | Eschweilera pseudodecolorans | 13.10 | 10.00 | 6.00  | 11.70 | 0.010660 |
| 30-Nov-12 | 495 | Eschweilera pseudodecolorans | 13.10 | 10.00 | 7.00  | 11.60 | 0.010036 |
| 30-Nov-12 | 495 | Eschweilera pseudodecolorans | 13.10 | 10.00 | 8.00  | 11.00 | 0.008999 |
| 30-Nov-12 | 495 | Eschweilera pseudodecolorans | 13.10 | 10.00 | 9.00  | 10.40 | 0.008828 |
| 30-Nov-12 | 495 | Eschweilera pseudodecolorans | 13.10 | 10.00 | 10.00 | 10.80 | 0        |
| 30-Nov-12 | 439 | Eschweilera coriacea         | 31.30 | 12.50 | 0.00  | 39.30 | 0.058085 |
| 30-Nov-12 | 439 | Eschweilera coriacea         | 31.30 | 12.50 | 0.5   | 37.60 | 0.053775 |
| 30-Nov-12 | 439 | Eschweilera coriacea         | 31.30 | 12.50 | 1.00  | 36.40 | 0.027151 |
| 30-Nov-12 | 439 | Eschweilera coriacea         | 31.30 | 12.50 | 1.30  | 31.30 | 0.053861 |
| 30-Nov-12 | 439 | Eschweilera coriacea         | 31.30 | 12.50 | 2.00  | 31.30 | 0.070146 |
| 30-Nov-12 | 439 | Eschweilera coriacea         | 31.30 | 12.50 | 3.00  | 28.40 | 0.060090 |
| 30-Nov-12 | 439 | Eschweilera coriacea         | 31.30 | 12.50 | 4.00  | 26.90 | 0.054556 |
| 30-Nov-12 | 439 | Eschweilera coriacea         | 31.30 | 12.50 | 5.00  | 25.80 | 0.050683 |
| 30-Nov-12 | 439 | Eschweilera coriacea         | 31.30 | 12.50 | 6.00  | 25.00 | 0.048502 |
| 30-Nov-12 | 439 | Eschweilera coriacea         | 31.30 | 12.50 | 7.00  | 24.70 | 0.046767 |
| 30-Nov-12 | 439 | Eschweilera coriacea         | 31.30 | 12.50 | 8.00  | 24.10 | 0.044866 |
| 30-Nov-12 | 439 | Eschweilera coriacea         | 31.30 | 12.50 | 9.00  | 23.70 | 0.043194 |
| 30-Nov-12 | 439 | Eschweilera coriacea         | 31.30 | 12.50 | 10.00 | 23.20 | 0.042091 |
| 30-Nov-12 | 439 | Eschweilera coriacea         | 31.30 | 12.50 | 11.00 | 23.10 | 0.041012 |
| 30-Nov-12 | 439 | Eschweilera coriacea         | 31.30 | 12.50 | 12.00 | 22.60 | 0.019532 |
| 30-Nov-12 | 439 | Eschweilera coriacea         | 31.30 | 12.50 | 12.50 | 22.00 | 0        |
| 3-Dec-12  | 846 | Eschweilera sp.              | 18.90 | 8.50  | 0.00  | 20.50 | 0.016027 |
| 3-Dec-12  | 846 | Eschweilera sp.              | 18.90 | 8.50  | 0.5   | 19.90 | 0.014939 |
| 3-Dec-12  | 846 | Eschweilera sp.              | 18.90 | 8.50  | 1.00  | 19.10 | 0.008506 |
| 3-Dec-12  | 846 | Eschweilera sp.              | 18.90 | 8.50  | 1.30  | 18.90 | 0.018627 |

|          |       |                          |       |       |      |       |          |
|----------|-------|--------------------------|-------|-------|------|-------|----------|
| 3-Dec-12 | 846   | Eschweilera sp.          | 18.90 | 8.50  | 2.00 | 17.90 | 0.024609 |
| 3-Dec-12 | 846   | Eschweilera sp.          | 18.90 | 8.50  | 3.00 | 17.50 | 0.023242 |
| 3-Dec-12 | 846   | Eschweilera sp.          | 18.90 | 8.50  | 4.00 | 16.90 | 0.021907 |
| 3-Dec-12 | 846   | Eschweilera sp.          | 18.90 | 8.50  | 5.00 | 16.50 | 0.021512 |
| 3-Dec-12 | 846   | Eschweilera sp.          | 18.90 | 8.50  | 6.00 | 16.60 | 0.019894 |
| 3-Dec-12 | 846   | Eschweilera sp.          | 18.90 | 8.50  | 7.00 | 15.20 | 0.019001 |
| 3-Dec-12 | 846   | Eschweilera sp.          | 18.90 | 8.50  | 8.00 | 15.90 | 0.011046 |
| 3-Dec-12 | 846   | Eschweilera sp.          | 18.90 | 8.50  | 8.50 | 17.60 | 0        |
| 3-Dec-12 | 852 F | Eschweilera wachenheimii | 10.50 | 5.00  | 0.00 | 12.10 | 0.005382 |
| 3-Dec-12 | 852 F | Eschweilera wachenheimii | 10.50 | 5.00  | 0.5  | 11.30 | 0.004883 |
| 3-Dec-12 | 852 F | Eschweilera wachenheimii | 10.50 | 5.00  | 1.00 | 11.00 | 0.002675 |
| 3-Dec-12 | 852 F | Eschweilera wachenheimii | 10.50 | 5.00  | 1.30 | 10.30 | 0.006064 |
| 3-Dec-12 | 852 F | Eschweilera wachenheimii | 10.50 | 5.00  | 2.00 | 10.70 | 0.008502 |
| 3-Dec-12 | 852 F | Eschweilera wachenheimii | 10.50 | 5.00  | 3.00 | 10.10 | 0.007777 |
| 3-Dec-12 | 852 F | Eschweilera wachenheimii | 10.50 | 5.00  | 4.00 | 9.80  | 0.007023 |
| 3-Dec-12 | 852 F | Eschweilera wachenheimii | 10.50 | 5.00  | 5.00 | 9.10  | 0        |
| 3-Dec-12 | 857   | Eschweilera wachenheimii | 18.20 | 7.50  | 0.00 | 20.20 | 0.015326 |
| 3-Dec-12 | 857   | Eschweilera wachenheimii | 18.20 | 7.50  | 0.5  | 19.30 | 0.013961 |
| 3-Dec-12 | 857   | Eschweilera wachenheimii | 18.20 | 7.50  | 1.00 | 18.40 | 0.007891 |
| 3-Dec-12 | 857   | Eschweilera wachenheimii | 18.20 | 7.50  | 1.30 | 18.20 | 0.017620 |
| 3-Dec-12 | 857   | Eschweilera wachenheimii | 18.20 | 7.50  | 2.00 | 17.60 | 0.024467 |
| 3-Dec-12 | 857   | Eschweilera wachenheimii | 18.20 | 7.50  | 3.00 | 17.70 | 0.022609 |
| 3-Dec-12 | 857   | Eschweilera wachenheimii | 18.20 | 7.50  | 4.00 | 16.20 | 0.020359 |
| 3-Dec-12 | 857   | Eschweilera wachenheimii | 18.20 | 7.50  | 5.00 | 16.00 | 0.019610 |
| 3-Dec-12 | 857   | Eschweilera wachenheimii | 18.20 | 7.50  | 6.00 | 15.60 | 0.018630 |
| 3-Dec-12 | 857   | Eschweilera wachenheimii | 18.20 | 7.50  | 7.00 | 15.20 | 0.009013 |
| 3-Dec-12 | 857   | Eschweilera wachenheimii | 18.20 | 7.50  | 7.50 | 15.10 | 0        |
| 3-Dec-12 | 933   | Eschweilera coriacea     | 29.60 | 15.00 | 0.00 | 31.40 | 0.037625 |
| 3-Dec-12 | 933   | Eschweilera coriacea     | 29.60 | 15.00 | 0.5  | 30.50 | 0.036173 |
| 3-Dec-12 | 933   | Eschweilera coriacea     | 29.60 | 15.00 | 1.00 | 30.20 | 0.021067 |
| 3-Dec-12 | 933   | Eschweilera coriacea     | 29.60 | 15.00 | 1.30 | 29.60 | 0.048007 |

|          |     |                              |       |       |       |       |          |
|----------|-----|------------------------------|-------|-------|-------|-------|----------|
| 3-Dec-12 | 933 | Eschweilera coriacea         | 29.60 | 15.00 | 2.00  | 29.50 | 0.067658 |
| 3-Dec-12 | 933 | Eschweilera coriacea         | 29.60 | 15.00 | 3.00  | 29.20 | 0.065604 |
| 3-Dec-12 | 933 | Eschweilera coriacea         | 29.60 | 15.00 | 4.00  | 28.60 | 0.063350 |
| 3-Dec-12 | 933 | Eschweilera coriacea         | 29.60 | 15.00 | 5.00  | 28.20 | 0.060496 |
| 3-Dec-12 | 933 | Eschweilera coriacea         | 29.60 | 15.00 | 6.00  | 27.30 | 0.058535 |
| 3-Dec-12 | 933 | Eschweilera coriacea         | 29.60 | 15.00 | 7.00  | 27.30 | 0.058108 |
| 3-Dec-12 | 933 | Eschweilera coriacea         | 29.60 | 15.00 | 8.00  | 27.10 | 0.057256 |
| 3-Dec-12 | 933 | Eschweilera coriacea         | 29.60 | 15.00 | 9.00  | 26.90 | 0.053751 |
| 3-Dec-12 | 933 | Eschweilera coriacea         | 29.60 | 15.00 | 10.00 | 25.40 | 0.051882 |
| 3-Dec-12 | 933 | Eschweilera coriacea         | 29.60 | 15.00 | 11.00 | 26.00 | 0.050894 |
| 3-Dec-12 | 933 | Eschweilera coriacea         | 29.60 | 15.00 | 12.00 | 24.90 | 0.047727 |
| 3-Dec-12 | 933 | Eschweilera coriacea         | 29.60 | 15.00 | 13.00 | 24.40 | 0.045252 |
| 3-Dec-12 | 933 | Eschweilera coriacea         | 29.60 | 15.00 | 14.00 | 23.60 | 0.043559 |
| 3-Dec-12 | 933 | Eschweilera coriacea         | 29.60 | 15.00 | 15.00 | 23.50 | 0        |
| 3-Dec-12 | 958 | Eschweilera grandiflora      | 14.60 | 10.50 | 0.00  | 15.00 | 0.008777 |
| 3-Dec-12 | 958 | Eschweilera grandiflora      | 14.60 | 10.50 | 0.5   | 14.90 | 0.008487 |
| 3-Dec-12 | 958 | Eschweilera grandiflora      | 14.60 | 10.50 | 1.00  | 14.50 | 0.004988 |
| 3-Dec-12 | 958 | Eschweilera grandiflora      | 14.60 | 10.50 | 1.30  | 14.60 | 0.011481 |
| 3-Dec-12 | 958 | Eschweilera grandiflora      | 14.60 | 10.50 | 2.00  | 14.30 | 0.014873 |
| 3-Dec-12 | 958 | Eschweilera grandiflora      | 14.60 | 10.50 | 3.00  | 13.20 | 0.013479 |
| 3-Dec-12 | 958 | Eschweilera grandiflora      | 14.60 | 10.50 | 4.00  | 13.00 | 0.012871 |
| 3-Dec-12 | 958 | Eschweilera grandiflora      | 14.60 | 10.50 | 5.00  | 12.60 | 0.012176 |
| 3-Dec-12 | 958 | Eschweilera grandiflora      | 14.60 | 10.50 | 6.00  | 12.30 | 0.011502 |
| 3-Dec-12 | 958 | Eschweilera grandiflora      | 14.60 | 10.50 | 7.00  | 11.90 | 0.011029 |
| 3-Dec-12 | 958 | Eschweilera grandiflora      | 14.60 | 10.50 | 8.00  | 11.80 | 0.011123 |
| 3-Dec-12 | 958 | Eschweilera grandiflora      | 14.60 | 10.50 | 9.00  | 12.00 | 0.010235 |
| 3-Dec-12 | 958 | Eschweilera grandiflora      | 14.60 | 10.50 | 10.00 | 10.80 | 0.004496 |
| 3-Dec-12 | 958 | Eschweilera grandiflora      | 14.60 | 10.50 | 10.50 | 10.60 | 0        |
| 4-Dec-12 | 968 | Eschweilera pseudodecolorans | 41.10 | 14.00 | 0.00  | 43.50 | 0.073122 |
| 4-Dec-12 | 968 | Eschweilera pseudodecolorans | 41.10 | 14.00 | 0.5   | 42.80 | 0.069459 |
| 4-Dec-12 | 968 | Eschweilera pseudodecolorans | 41.10 | 14.00 | 1.00  | 41.30 | 0.039995 |



|          |      |                              |       |       |       |       |          |
|----------|------|------------------------------|-------|-------|-------|-------|----------|
| 4-Dec-12 | 968  | Eschweilera pseudodecolorans | 41.10 | 14.00 | 1.30  | 41.10 | 0.089324 |
| 4-Dec-12 | 968  | Eschweilera pseudodecolorans | 41.10 | 14.00 | 2.00  | 39.50 | 0.121307 |
| 4-Dec-12 | 968  | Eschweilera pseudodecolorans | 41.10 | 14.00 | 3.00  | 39.10 | 0.117942 |
| 4-Dec-12 | 968  | Eschweilera pseudodecolorans | 41.10 | 14.00 | 4.00  | 38.40 | 0.116114 |
| 4-Dec-12 | 968  | Eschweilera pseudodecolorans | 41.10 | 14.00 | 5.00  | 38.50 | 0.114022 |
| 4-Dec-12 | 968  | Eschweilera pseudodecolorans | 41.10 | 14.00 | 6.00  | 37.70 | 0.109865 |
| 4-Dec-12 | 968  | Eschweilera pseudodecolorans | 41.10 | 14.00 | 7.00  | 37.10 | 0.105228 |
| 4-Dec-12 | 968  | Eschweilera pseudodecolorans | 41.10 | 14.00 | 8.00  | 36.10 | 0.102923 |
| 4-Dec-12 | 968  | Eschweilera pseudodecolorans | 41.10 | 14.00 | 9.00  | 36.30 | 0.100679 |
| 4-Dec-12 | 968  | Eschweilera pseudodecolorans | 41.10 | 14.00 | 10.00 | 35.30 | 0.098424 |
| 4-Dec-12 | 968  | Eschweilera pseudodecolorans | 41.10 | 14.00 | 11.00 | 35.50 | 0.098701 |
| 4-Dec-12 | 968  | Eschweilera pseudodecolorans | 41.10 | 14.00 | 12.00 | 35.40 | 0.095143 |
| 4-Dec-12 | 968  | Eschweilera pseudodecolorans | 41.10 | 14.00 | 13.00 | 34.20 | 0.096825 |
| 4-Dec-12 | 968  | Eschweilera pseudodecolorans | 41.10 | 14.00 | 14.00 | 36.00 | 0        |
| 4-Dec-12 | 961  | Eschweilera wachenheimii     | 25.80 | 10.00 | 0.00  | 26.60 | 0.027786 |
| 4-Dec-12 | 961  | Eschweilera wachenheimii     | 25.80 | 10.00 | 0.5   | 26.60 | 0.027166 |
| 4-Dec-12 | 961  | Eschweilera wachenheimii     | 25.80 | 10.00 | 1.00  | 26.00 | 0.015806 |
| 4-Dec-12 | 961  | Eschweilera wachenheimii     | 25.80 | 10.00 | 1.30  | 25.80 | 0.035754 |
| 4-Dec-12 | 961  | Eschweilera wachenheimii     | 25.80 | 10.00 | 2.00  | 25.20 | 0.049286 |
| 4-Dec-12 | 961  | Eschweilera wachenheimii     | 25.80 | 10.00 | 3.00  | 24.90 | 0.046405 |
| 4-Dec-12 | 961  | Eschweilera wachenheimii     | 25.80 | 10.00 | 4.00  | 23.70 | 0.043012 |
| 4-Dec-12 | 961  | Eschweilera wachenheimii     | 25.80 | 10.00 | 5.00  | 23.10 | 0.042457 |
| 4-Dec-12 | 961  | Eschweilera wachenheimii     | 25.80 | 10.00 | 6.00  | 23.40 | 0.040682 |
| 4-Dec-12 | 961  | Eschweilera wachenheimii     | 25.80 | 10.00 | 7.00  | 22.10 | 0.037842 |
| 4-Dec-12 | 961  | Eschweilera wachenheimii     | 25.80 | 10.00 | 8.00  | 21.80 | 0.039436 |
| 4-Dec-12 | 961  | Eschweilera wachenheimii     | 25.80 | 10.00 | 9.00  | 23.00 | 0.040478 |
| 4-Dec-12 | 961  | Eschweilera wachenheimii     | 25.80 | 10.00 | 10.00 | 22.40 | 0        |
| 4-Dec-12 | 1688 | Eschweilera truncata         | 19.00 | 8.00  | 0.00  | 20.50 | 0.016423 |
| 4-Dec-12 | 1688 | Eschweilera truncata         | 19.00 | 8.00  | 0.5   | 20.40 | 0.015334 |
| 4-Dec-12 | 1688 | Eschweilera truncata         | 19.00 | 8.00  | 1.00  | 19.10 | 0.008551 |
| 4-Dec-12 | 1688 | Eschweilera truncata         | 19.00 | 8.00  | 1.30  | 19.00 | 0.020163 |

|          |      |                          |       |       |       |       |          |
|----------|------|--------------------------|-------|-------|-------|-------|----------|
| 4-Dec-12 | 1688 | Eschweilera truncata     | 19.00 | 8.00  | 2.00  | 19.30 | 0.027210 |
| 4-Dec-12 | 1688 | Eschweilera truncata     | 19.00 | 8.00  | 3.00  | 17.90 | 0.024065 |
| 4-Dec-12 | 1688 | Eschweilera truncata     | 19.00 | 8.00  | 4.00  | 17.10 | 0.022435 |
| 4-Dec-12 | 1688 | Eschweilera truncata     | 19.00 | 8.00  | 5.00  | 16.70 | 0.021005 |
| 4-Dec-12 | 1688 | Eschweilera truncata     | 19.00 | 8.00  | 6.00  | 16.00 | 0.019856 |
| 4-Dec-12 | 1688 | Eschweilera truncata     | 19.00 | 8.00  | 7.00  | 15.80 | 0.019238 |
| 4-Dec-12 | 1688 | Eschweilera truncata     | 19.00 | 8.00  | 8.00  | 15.50 | 0        |
| 5-Dec-12 | 1690 | Eschweilera wachenheimii | 21.40 | 8.00  | 0.00  | 23.30 | 0.020867 |
| 5-Dec-12 | 1690 | Eschweilera wachenheimii | 21.40 | 8.00  | 0.5   | 22.80 | 0.019538 |
| 5-Dec-12 | 1690 | Eschweilera wachenheimii | 21.40 | 8.00  | 1.00  | 21.80 | 0.010994 |
| 5-Dec-12 | 1690 | Eschweilera wachenheimii | 21.40 | 8.00  | 1.30  | 21.40 | 0.024141 |
| 5-Dec-12 | 1690 | Eschweilera wachenheimii | 21.40 | 8.00  | 2.00  | 20.50 | 0.031589 |
| 5-Dec-12 | 1690 | Eschweilera wachenheimii | 21.40 | 8.00  | 3.00  | 19.60 | 0.028818 |
| 5-Dec-12 | 1690 | Eschweilera wachenheimii | 21.40 | 8.00  | 4.00  | 18.70 | 0.027172 |
| 5-Dec-12 | 1690 | Eschweilera wachenheimii | 21.40 | 8.00  | 5.00  | 18.50 | 0.026880 |
| 5-Dec-12 | 1690 | Eschweilera wachenheimii | 21.40 | 8.00  | 6.00  | 18.50 | 0.025882 |
| 5-Dec-12 | 1690 | Eschweilera wachenheimii | 21.40 | 8.00  | 7.00  | 17.80 | 0.024607 |
| 5-Dec-12 | 1690 | Eschweilera wachenheimii | 21.40 | 8.00  | 8.00  | 17.60 | 0        |
| 5-Dec-12 | 2491 | Eschweilera coriacea     | 20.20 | 11.00 | 0.00  | 23.90 | 0.022431 |
| 5-Dec-12 | 2491 | Eschweilera coriacea     | 20.20 | 11.00 | 0.5   | 23.90 | 0.022059 |
| 5-Dec-12 | 2491 | Eschweilera coriacea     | 20.20 | 11.00 | 1.00  | 23.50 | 0.011313 |
| 5-Dec-12 | 2491 | Eschweilera coriacea     | 20.20 | 11.00 | 1.30  | 20.20 | 0.021993 |
| 5-Dec-12 | 2491 | Eschweilera coriacea     | 20.20 | 11.00 | 2.00  | 19.80 | 0.029872 |
| 5-Dec-12 | 2491 | Eschweilera coriacea     | 20.20 | 11.00 | 3.00  | 19.20 | 0.028953 |
| 5-Dec-12 | 2491 | Eschweilera coriacea     | 20.20 | 11.00 | 4.00  | 19.20 | 0.028653 |
| 5-Dec-12 | 2491 | Eschweilera coriacea     | 20.20 | 11.00 | 5.00  | 19.00 | 0.027472 |
| 5-Dec-12 | 2491 | Eschweilera coriacea     | 20.20 | 11.00 | 6.00  | 18.40 | 0.026160 |
| 5-Dec-12 | 2491 | Eschweilera coriacea     | 20.20 | 11.00 | 7.00  | 18.10 | 0.024892 |
| 5-Dec-12 | 2491 | Eschweilera coriacea     | 20.20 | 11.00 | 8.00  | 17.50 | 0.023916 |
| 5-Dec-12 | 2491 | Eschweilera coriacea     | 20.20 | 11.00 | 9.00  | 17.40 | 0.023238 |
| 5-Dec-12 | 2491 | Eschweilera coriacea     | 20.20 | 11.00 | 10.00 | 17.00 | 0.023375 |

|          |      |                              |       |       |       |       |          |
|----------|------|------------------------------|-------|-------|-------|-------|----------|
| 5-Dec-12 | 2491 | Eschweilera coriacea         | 20.20 | 11.00 | 11.00 | 17.50 | 0        |
| 5-Dec-12 | 2490 | Eschweilera coriacea         | 25.50 | 11.00 | 0.00  | 26.70 | 0.027373 |
| 5-Dec-12 | 2490 | Eschweilera coriacea         | 25.50 | 11.00 | 0.5   | 26.10 | 0.026143 |
| 5-Dec-12 | 2490 | Eschweilera coriacea         | 25.50 | 11.00 | 1.00  | 25.50 | 0.015321 |
| 5-Dec-12 | 2490 | Eschweilera coriacea         | 25.50 | 11.00 | 1.30  | 25.50 | 0.034781 |
| 5-Dec-12 | 2490 | Eschweilera coriacea         | 25.50 | 11.00 | 2.00  | 24.80 | 0.047917 |
| 5-Dec-12 | 2490 | Eschweilera coriacea         | 25.50 | 11.00 | 3.00  | 24.60 | 0.046009 |
| 5-Dec-12 | 2490 | Eschweilera coriacea         | 25.50 | 11.00 | 4.00  | 23.80 | 0.043563 |
| 5-Dec-12 | 2490 | Eschweilera coriacea         | 25.50 | 11.00 | 5.00  | 23.30 | 0.041200 |
| 5-Dec-12 | 2490 | Eschweilera coriacea         | 25.50 | 11.00 | 6.00  | 22.50 | 0.039060 |
| 5-Dec-12 | 2490 | Eschweilera coriacea         | 25.50 | 11.00 | 7.00  | 22.10 | 0.037842 |
| 5-Dec-12 | 2490 | Eschweilera coriacea         | 25.50 | 11.00 | 8.00  | 21.80 | 0.036647 |
| 5-Dec-12 | 2490 | Eschweilera coriacea         | 25.50 | 11.00 | 9.00  | 21.40 | 0.035800 |
| 5-Dec-12 | 2490 | Eschweilera coriacea         | 25.50 | 11.00 | 10.00 | 21.30 | 0.035300 |
| 5-Dec-12 | 2490 | Eschweilera coriacea         | 25.50 | 11.00 | 11.00 | 21.10 | 0        |
| 6-Dec-12 | 980  | Eschweilera pseudodecolorans | 13.90 | 9.80  | 0.00  | 16.30 | 0.009576 |
| 6-Dec-12 | 980  | Eschweilera pseudodecolorans | 13.90 | 9.80  | 0.5   | 14.90 | 0.008487 |
| 6-Dec-12 | 980  | Eschweilera pseudodecolorans | 13.90 | 9.80  | 1.00  | 14.50 | 0.004753 |
| 6-Dec-12 | 980  | Eschweilera pseudodecolorans | 13.90 | 9.80  | 1.30  | 13.90 | 0.010395 |
| 6-Dec-12 | 980  | Eschweilera pseudodecolorans | 13.90 | 9.80  | 2.00  | 13.60 | 0.013900 |
| 6-Dec-12 | 980  | Eschweilera pseudodecolorans | 13.90 | 9.80  | 3.00  | 13.00 | 0.012871 |
| 6-Dec-12 | 980  | Eschweilera pseudodecolorans | 13.90 | 9.80  | 4.00  | 12.60 | 0.012974 |
| 6-Dec-12 | 980  | Eschweilera pseudodecolorans | 13.90 | 9.80  | 5.00  | 13.10 | 0.012394 |
| 6-Dec-12 | 980  | Eschweilera pseudodecolorans | 13.90 | 9.80  | 6.00  | 12.00 | 0.011404 |
| 6-Dec-12 | 980  | Eschweilera pseudodecolorans | 13.90 | 9.80  | 7.00  | 12.10 | 0.011594 |
| 6-Dec-12 | 980  | Eschweilera pseudodecolorans | 13.90 | 9.80  | 8.00  | 12.20 | 0.010859 |
| 6-Dec-12 | 980  | Eschweilera pseudodecolorans | 13.90 | 9.80  | 9.00  | 11.30 | 0.007952 |
| 6-Dec-12 | 980  | Eschweilera pseudodecolorans | 13.90 | 9.80  | 9.80  | 11.20 | 0        |
| 6-Dec-12 | 315  | Eschweilera truncata         | 56.00 | 13.00 | 0.00  | 65.90 | 0.170542 |
| 6-Dec-12 | 315  | Eschweilera truncata         | 56.00 | 13.00 | 0.5   | 65.90 | 0.165194 |
| 6-Dec-12 | 315  | Eschweilera truncata         | 56.00 | 13.00 | 1.00  | 63.80 | 0.084899 |

|          |     |                      |       |       |       |       |          |
|----------|-----|----------------------|-------|-------|-------|-------|----------|
| 6-Dec-12 | 315 | Eschweilera truncata | 56.00 | 13.00 | 1.30  | 56.00 | 0.186158 |
| 6-Dec-12 | 315 | Eschweilera truncata | 56.00 | 13.00 | 2.00  | 60.30 | 0.262880 |
| 6-Dec-12 | 315 | Eschweilera truncata | 56.00 | 13.00 | 3.00  | 55.30 | 0.232491 |
| 6-Dec-12 | 315 | Eschweilera truncata | 56.00 | 13.00 | 4.00  | 53.50 | 0.213742 |
| 6-Dec-12 | 315 | Eschweilera truncata | 56.00 | 13.00 | 5.00  | 50.80 | 0.195629 |
| 6-Dec-12 | 315 | Eschweilera truncata | 56.00 | 13.00 | 6.00  | 49.00 | 0.184765 |
| 6-Dec-12 | 315 | Eschweilera truncata | 56.00 | 13.00 | 7.00  | 48.00 | 0.178336 |
| 6-Dec-12 | 315 | Eschweilera truncata | 56.00 | 13.00 | 8.00  | 47.30 | 0.174605 |
| 6-Dec-12 | 315 | Eschweilera truncata | 56.00 | 13.00 | 9.00  | 47.00 | 0.173864 |
| 6-Dec-12 | 315 | Eschweilera truncata | 56.00 | 13.00 | 10.00 | 47.10 | 0.172028 |
| 6-Dec-12 | 315 | Eschweilera truncata | 56.00 | 13.00 | 11.00 | 46.50 | 0.178814 |
| 6-Dec-12 | 315 | Eschweilera truncata | 56.00 | 13.00 | 12.00 | 48.90 | 0.187805 |
| 6-Dec-12 | 315 | Eschweilera truncata | 56.00 | 13.00 | 13.00 | 48.90 | 0        |
