# Supplementary material
Source: MDPI journal article supplement (https://www.mdpi.com/1999-4907/8/5/154)
Supplement: s1 [file s1]

| N. | Tree_ID | Specie                       | DBH (cm) | Merchantable Height (m) | Total Volume (m³) | Form Factor ( <i>f</i> ) |
|----|---------|------------------------------|----------|-------------------------|-------------------|--------------------------|
| 1  | 63      | Eschweilera pseudodecolorans | 37.7     | 11                      | 1.014             | 0.83                     |
| 2  | 68      | Eschweilera pedicellata      | 16.3     | 9                       | 0.152             | 0.81                     |
| 3  | 77      | Eschweilera truncata         | 21.8     | 12                      | 0.340             | 0.76                     |
| 4  | 87      | Eschweilera wachenheimii     | 24.5     | 8                       | 0.331             | 0.88                     |
| 5  | 116     | Eschweilera pedicellata      | 14.3     | 9.5                     | 0.116             | 0.76                     |
| 6  | 121     | Eschweilera wachenheimii     | 19.8     | 7.5                     | 0.210             | 0.91                     |
| 7  | 122     | Eschweilera wachenheimii     | 18.8     | 8.5                     | 0.194             | 0.82                     |
| 8  | 150     | Eschweilera coriacea         | 18.2     | 9                       | 0.211             | 0.90                     |
| 9  | 151     | Eschweilera wachenheimii     | 25.5     | 12.5                    | 0.483             | 0.76                     |
| 10 | 163     | Eschweilera wachenheimii     | 24.51    | 8                       | 0.332             | 0.88                     |
| 11 | 195     | Eschweilera wachenheimii     | 19.4     | 10.7                    | 0.256             | 0.81                     |
| 12 | 234     | Eschweilera wachenheimii     | 26.3     | 11                      | 0.485             | 0.81                     |
| 13 | 243     | Eschweilera wachenheimii     | 11.52    | 8                       | 0.067             | 0.81                     |
| 14 | 264     | Eschweilera wachenheimii     | 16.77    | 9.8                     | 0.187             | 0.86                     |
| 15 | 268     | Eschweilera wachenheimii     | 15.6     | 7.5                     | 0.109             | 0.76                     |
| 16 | 269     | Eschweilera bracteosa        | 13.2     | 11                      | 0.123             | 0.82                     |
| 17 | 281     | Eschweilera wachenheimii     | 15.7     | 8                       | 0.131             | 0.85                     |
| 18 | 300     | Eschweilera wachenheimii     | 25.3     | 11                      | 0.434             | 0.78                     |
| 19 | 310     | Eschweilera wachenheimii     | 16       | 7                       | 0.120             | 0.86                     |
| 20 | 315     | Eschweilera truncata         | 56       | 13                      | 2.762             | 0.86                     |
| 21 | 336     | Eschweilera wachenheimii     | 23       | 12                      | 0.358             | 0.72                     |
| 22 | 337     | Eschweilera wachenheimii     | 12.4     | 10                      | 0.090             | 0.74                     |
| 23 | 339     | Eschweilera pseudodecolorans | 31.6     | 17                      | 0.953             | 0.71                     |
| 24 | 340     | Eschweilera coriacea         | 38.2     | 11.5                    | 1.126             | 0.85                     |
| 25 | 352     | Eschweilera truncata         | 38.3     | 15                      | 1.131             | 0.65                     |
| 26 | 355     | Eschweilera truncata         | 23.8     | 10.5                    | 0.393             | 0.84                     |
| 27 | 439     | Eschweilera coriacea         | 31.3     | 12.5                    | 0.714             | 0.74                     |
| 28 | 444     | Eschweilera wachenheimii     | 11.5     | 8                       | 0.074             | 0.89                     |
| 29 | 451     | Eschweilera micrantha        | 34.4     | 11                      | 0.849             | 0.83                     |
| 30 | 465     | Eschweilera wachenheimii     | 15.4     | 9                       | 0.158             | 0.94                     |
| 31 | 495     | Eschweilera pseudodecolorans | 13.1     | 10                      | 0.113             | 0.84                     |

|    |        |                              |       |      |       |      |
|----|--------|------------------------------|-------|------|-------|------|
| 32 | 512    | Eschweilera wachenheimii     | 17.4  | 8    | 0.157 | 0.83 |
| 33 | 515    | Eschweilera wachenheimii     | 18.6  | 8    | 0.189 | 0.87 |
| 34 | 531    | Eschweilera wachenheimii     | 13.2  | 8    | 0.100 | 0.91 |
| 35 | 533    | Eschweilera wachenheimii     | 15.8  | 7    | 0.124 | 0.90 |
| 36 | 590    | Eschweilera pedicellata      | 25    | 11   | 0.453 | 0.84 |
| 37 | 604    | Eschweilera pedicellata      | 13.7  | 7.5  | 0.107 | 0.96 |
| 38 | 623    | Eschweilera truncata         | 42.8  | 13   | 1.504 | 0.80 |
| 39 | 642    | Eschweilera atropetiolata    | 20.5  | 10   | 0.248 | 0.75 |
| 40 | 656    | Eschweilera wachenheimii     | 17    | 7    | 0.149 | 0.94 |
| 41 | 716    | Eschweilera wachenheimii     | 15.4  | 7.5  | 0.125 | 0.89 |
| 42 | 718    | Eschweilera truncata         | 19.35 | 10.5 | 0.227 | 0.74 |
| 43 | 719    | Eschweilera wachenheimii     | 12.7  | 9    | 0.091 | 0.80 |
| 44 | 846    | Eschweilera sp.              | 18.9  | 8.5  | 0.199 | 0.84 |
| 45 | 857    | Eschweilera wachenheimii     | 18.2  | 7.5  | 0.169 | 0.87 |
| 46 | 933    | Eschweilera coriacea         | 29.6  | 15   | 0.867 | 0.84 |
| 47 | 958    | Eschweilera grandiflora      | 14.6  | 10.5 | 0.136 | 0.77 |
| 48 | 961    | Eschweilera wachenheimii     | 25.8  | 10   | 0.446 | 0.85 |
| 49 | 968    | Eschweilera pseudodecolorans | 41.1  | 14   | 1.549 | 0.83 |
| 50 | 980    | Eschweilera pseudodecolorans | 13.9  | 9.8  | 0.127 | 0.86 |
| 51 | 1005   | Eschweilera sp.              | 47.15 | 11   | 1.462 | 0.76 |
| 52 | 1688   | Eschweilera truncata         | 19    | 8    | 0.194 | 0.86 |
| 53 | 1690   | Eschweilera wachenheimii     | 21.4  | 8    | 0.240 | 0.84 |
| 54 | 2490   | Eschweilera coriacea         | 25.5  | 11   | 0.467 | 0.83 |
| 55 | 2491   | Eschweilera coriacea         | 20.2  | 11   | 0.314 | 0.89 |
| 56 | 228 B  | Eschweilera wachenheimii     | 16.7  | 8.5  | 0.150 | 0.80 |
| 57 | 234X   | Eschweilera sp.              | 19.65 | 16.6 | 0.395 | 0.78 |
| 58 | 237X   | Eschweilera sp.              | 22.15 | 12.7 | 0.396 | 0.81 |
| 59 | 258 A3 | Eschweilera truncata         | 17    | 9.5  | 0.182 | 0.84 |
| 60 | 282X   | Eschweilera sp.              | 23.25 | 13   | 0.434 | 0.79 |
| 61 | 293X   | Eschweilera sp.              | 13.1  | 9.7  | 0.111 | 0.85 |
| 62 | 329 D  | Eschweilera wachenheimii     | 11.1  | 6    | 0.051 | 0.88 |
| 63 | 852 F  | Eschweilera wachenheimii     | 10.5  | 5    | 0.042 | 0.98 |
| 64 | S/N    | Eschweilera sp.              | 39.8  | 14.5 | 1.275 | 0.71 |

---
